# Supplementary material
Source: PubMed Central journal article supplement (PMC4078820)
Supplement: 1405484111_pnas.1405484111.sapp.pdf [file 1405484111_pnas.1405484111.sapp.pdf]

## **SUPPORTING INFORMATION**

### **TITLE:**

Medically important differences in snake venom composition are dictated by distinct postgenomic mechanisms

### **AUTHORS:**

Nicholas R. Casewell, Simon C. Wagstaff, Wolfgang Wüster, Darren A.N. Cook, Fiona M.S. Bolton, Sarah I. King, Davinia Pla, Libia Sanz, Juan J. Calvete, Robert A. Harrison

### **ABSTRACT:**

Variation in venom composition is a ubiquitous phenomenon in snakes and occurs both interspecifically and intraspecifically. Venom variation can have severe outcomes for snakebite victims by rendering the specific antibodies found in antivenoms ineffective against heterologous toxins found in different venoms. The rapid evolutionary expansion of different toxin-encoding gene families in different snake lineages is widely perceived as the main cause of venom variation. However, this view is simplistic and disregards the understudied influence that processes acting on gene transcription and translation may have on the production of the venom proteome. Here, we assess the venom composition of six related viperid snakes and compare interspecific changes in the number of toxin genes, their transcription in the venom gland and their translation into proteins secreted in venom. Our results reveal that multiple levels of regulation are responsible for generating variation in venom composition between related snake species. We demonstrate that differential levels of toxin transcription, translation and their posttranslational modification have a substantial impact upon the resulting venom protein mixture. Notably, these processes act to varying extents on different toxin paralogs found in different snakes, and are therefore likely to be as important as ancestral gene duplication events for generating compositionally distinct venom proteomes. Our results suggest that these processes may also contribute to altering the toxicity of snake venoms, and we demonstrate how this variability can undermine the treatment of a neglected tropical disease, snakebite.

## 1. SI MATERIALS AND METHODS

### 1.1. Venom gland transcriptomes

The construction of venom gland transcriptomes for four saw-scaled viper species [*E. ocellatus* (Nigeria), *E. p. leakeyi* (Kenya), *E. coloratus* (Egypt) and *E. c. sochureki* (United Arab Emirates)] have previously been described (1, 2). Here, we constructed complementary venom gland transcriptomes for *B. arietans* (Nigeria) and *C. cerastes* (Egypt) in an identical manner for the purposes of direct comparison. Briefly, the libraries were constructed by using mRNA extracted from venom glands pooled from 10 individuals of each species by using the CloneMiner method, with ~1000 clones sequenced by using Sanger sequencing for each library. Ten individuals were used for each species to provide a representative transcriptome that accounts for any intra-specific variation in venom toxin expression. All venom gland material was dissected 3 d after venom extraction, and each transcriptome therefore represents a snap-shot of toxin transcription at this time point, where transcription during venom replenishment is at its peak (3). Generated ESTs were subsequently assembled into contigs (putative gene products) and annotated as described (1, 2). The number of ESTs contributing to each contig was used as a measure of transcription. Assembled contigs and individual ESTs were then subjected to six frame translations and used as reference databases to facilitate proteomic identification.

### 1.2. Venom proteomes

Proteins from each crude, lyophilized venom (2 mg extracted from the same individuals used for venom gland transcriptomics) were separated by reverse-phase HPLC as previously described (4). Fractions were collected manually, dried in a vacuum centrifuge (Savant), redissolved in water, and submitted to SDS-PAGE analysis (under non-reducing and reducing conditions) with Coomassie brilliant blue R-250 staining. Isolated RP-HPLC fractions were subjected to N-terminal sequencing and molecular mass determination (4). For MS/MS analyses, protein bands were excised and subjected to in-gel reduction and alkylation, and trypsin digestion (4). Tryptic peptide mass fingerprints were recorded with an Applied Biosystems' 5800 MALDI-TOF-TOF™ instrument. Up to 50 precursor ions were submitted to collision-induced dissociation (CID) MS/MS analysis. For ESI-CID-MS/MS, each tryptic peptide digest was either loaded in a nanospray capillary column and subjected to nanoelectrospray ionization (ESI) mass spectrometric analysis using a QTrap™ 2000 mass spectrometer (Applied Biosystems) or submitted to nano-Acquity UltraPerformance uPLC separation in-line with a Waters SYNAPT G2 HD mass spectrometry system. Production spectra of doubly- and triply-charged ions were interpreted manually or searched against the National Center for Biotechnology Information and UniProt/SwissProt databases, and against each species-specific venom gland transcriptome dataset by using ProteinPilot v.4 and the Paragon® algorithm (ABSciex) at ≥95% confidence (MALDI-TOF-TOF spectra); the on-line form of MASCOT (nESI-MS/MS spectra); or processed in ProteinLynx Global SERVER 2013 version 2.5.2. MS/MS

mass tolerance was set to  $\pm 0.6$  Da. Carbamidomethyl cysteine and oxidation of methionine were selected as fixed and variable modifications, respectively. The relative abundances (expressed as percentage of the total venom proteins) of the different protein families were calculated from the relation of the sum of the areas of the reverse-phase chromatographic peaks (containing proteins from the same family), to the total area of venom protein peaks in the reverse-phase chromatogram. The relative contributions of different proteins eluting in the same chromatographic fraction was estimated by densitometry of Coomassie brilliant blue-stained SDS-PAGE gels, as previously outlined (4).

### 1.3. Toxin evolution

Toxin gene sequences annotated as SVMP, PLA<sub>2</sub>, CTL, SP, LAAO or CRISP in the transcriptomes were extracted and analysed to reconstruct their evolutionary history. These gene families were selected based on the results of the proteomic analyses, which identified the presence of these toxin types in the venom of the majority of the sampled species. The remaining toxin family identified and analysed, the short-coding disintegrins (DIS), were discarded from phylogenetic analysis due to their apparent convergent evolution from SVMPs (5, 6). For each toxin family, non-redundant nucleotide sequences from each of the six transcriptomes were aligned with published gene homologs isolated from the venom systems of other viperid snakes, using the MUSCLE algorithm (7). Where available, full-length primer-walked toxins sequences generated by our previous work on these species were incorporated into the alignments (5, 8). Phylogenetic analyses for each toxin family were performed by incorporating optimised models of sequence evolution (Table S8), selected by the Akaike information criterion in MrModelTest (<http://www.abc.se/~nylander/mrmodeltest2/mrmodeltest2.html>), into MrBayes v3.2 (9). Nucleotide gene trees were generated in duplicate using four chains for  $1 \times 10^7$  generations, sampling every 500<sup>th</sup> cycle from the chain and using default settings in regards to priors. Tracer v1.4 (10) was used to estimate effective sample sizes for all parameters and to verify the point of convergence (burnin), with trees generated prior to this point discarded. The resulting sequence alignments have been submitted to the Dryad data repository (doi:10.5061/dryad.1j292).

### 1.4. Gene and protein comparisons

Proteomic matches to transcriptome gene products were overlaid on to the generated gene trees, alongside calculations of protein abundance. We applied the following rules to the data: (i) We conservatively retained the longest nucleotide sequence for each transcriptome contig and discarded all other sequence variants. These sequences are unlikely to represent distinct genes, but rather are the result of allelic variation (as ten specimens were used for library construction). We removed these sequences to prevent artificial inflation of gene numbers generated by the reconciliation analyses described below. (ii) Where different contigs from the same species exhibited monophyly and did not result in distinct proteome matches, we merged the contigs and

discarded non-matching sequences due to sequence redundancy. (iii) Sequences from contigs that were non-monophyletic with other contigs from the same species and had no proteomic match were retained and annotated with 'no proteomic hit' - indicative of non-translation of the transcript. (iv) Post-translational modifications (i.e. proteolytic cleavage) were assigned where multiple proteomic matches to the same transcriptome cluster were found in distinct non-overlapping proteomic fractions.

### 1.5. Gene/species tree reconciliation

We reconciled the resulting gene trees with the species tree presented in Fig. 1 using NOTUNG.v2.6 (11). Each *Echis/Bitis/Cerastes* toxin clade was analysed separately using the reconciliation option, which produces a reconciled tree displaying the timing of gene duplication and loss events, and the predicted number of gene loci. As NOTUNG permits the reconciliation of genes trees to non-binary species trees (11), we utilised this option when clade support in the gene tree exhibited a Bayesian posterior probability of <0.95. This approach allowed nodes that were not robustly supported in the gene tree to be reconciled with a polytomous species tree. We used this conservative approach to mitigate the generation of spurious gene duplication events that would otherwise be generated as artefacts of uncertainty in the gene tree.

### 1.6. Functional studies

The same venom samples used for proteomic analyses were used for functional assessments. All animal experimentation was conducted using standard protocols approved by the Liverpool School of Tropical Medicine Animal Welfare and Ethical Review Board and the UK Home Office (licence # 40/3216, 40/3151, 40/3718). Murine *in vivo* lethality studies were conducted to calculate the Lethal Dose 50 (LD<sub>50</sub> – the amount of venom that kills 50% of injected mice) for *B. arietans* and *C. cerastes* venom. Experiments were undertaken as previously described (12), with groups of five male CD-1 mice (18-20 g) receiving varying doses of venom (in 100 µL PBS) intravenously. The number of mice surviving after seven hours was recorded and the venom LD<sub>50</sub> and 95% confidence limits calculated by probit analysis (13). Comparisons with our previous results for the four *Echis* species (12) were undertaken using the 95% confidence limits. LD<sub>50</sub> values for venom lethality to scorpions and locusts were reproduced from our earlier work (14, 15). We next tested the efficacy of the *E. ocellatus* monospecific antivenom, EchiTAbG, at neutralising five times the venom LD<sub>50</sub> for *B. arietans* and *C. cerastes* in the same murine model. These effective dose 50 (ED<sub>50</sub>) assays were undertaken as previously described for the four *Echis* species (12), with groups of mice receiving the maximum amount of antivenom permitted by the assay (150 µL). The antivenom was mixed with five venom LD<sub>50</sub> doses in 50 µL PBS, pre-incubated at 37°C for 30 mins, injected intravenously into five mice and survival recorded seven hours later. The ED<sub>50</sub> and 95% confidence limits used for comparisons among species were calculated by probit analysis (13). Modified minimum haemorrhagic dose (MHD) experiments (16) were undertaken to compare

the haemorrhagic activity of each venom. Ten microgram doses of venom were injected intradermally into the shaved dorsal skin of groups of six male CD-1 mice (18-20 g) under light anaesthesia (three mice for *C. cerastes*). After 24 hours the dorsal skin was removed and the size of the lesion on the inner surface of the skin measured in two directions at right angles using callipers and background illumination. The mean diameter of each lesion was calculated and comparative statistical analysis undertaken using paired two-tailed t-tests with a *P*-value threshold of 0.05. The procoagulant activity of each venom was determined using the minimum coagulant dose (MCD-P) assay (16). Varying doses of venom were incubated with 200  $\mu$ L of human or mouse plasma (Sigma) at 37°C and the clotting time recorded in triplicate. The MCD was calculated by plotting clotting time against venom dose and calculating the 60-s clotting time from the equation of the line. Statistical comparisons were undertaken using regression analysis of the plotted lines with a *P*-value threshold of 0.05.

## 2. SI FIGURES

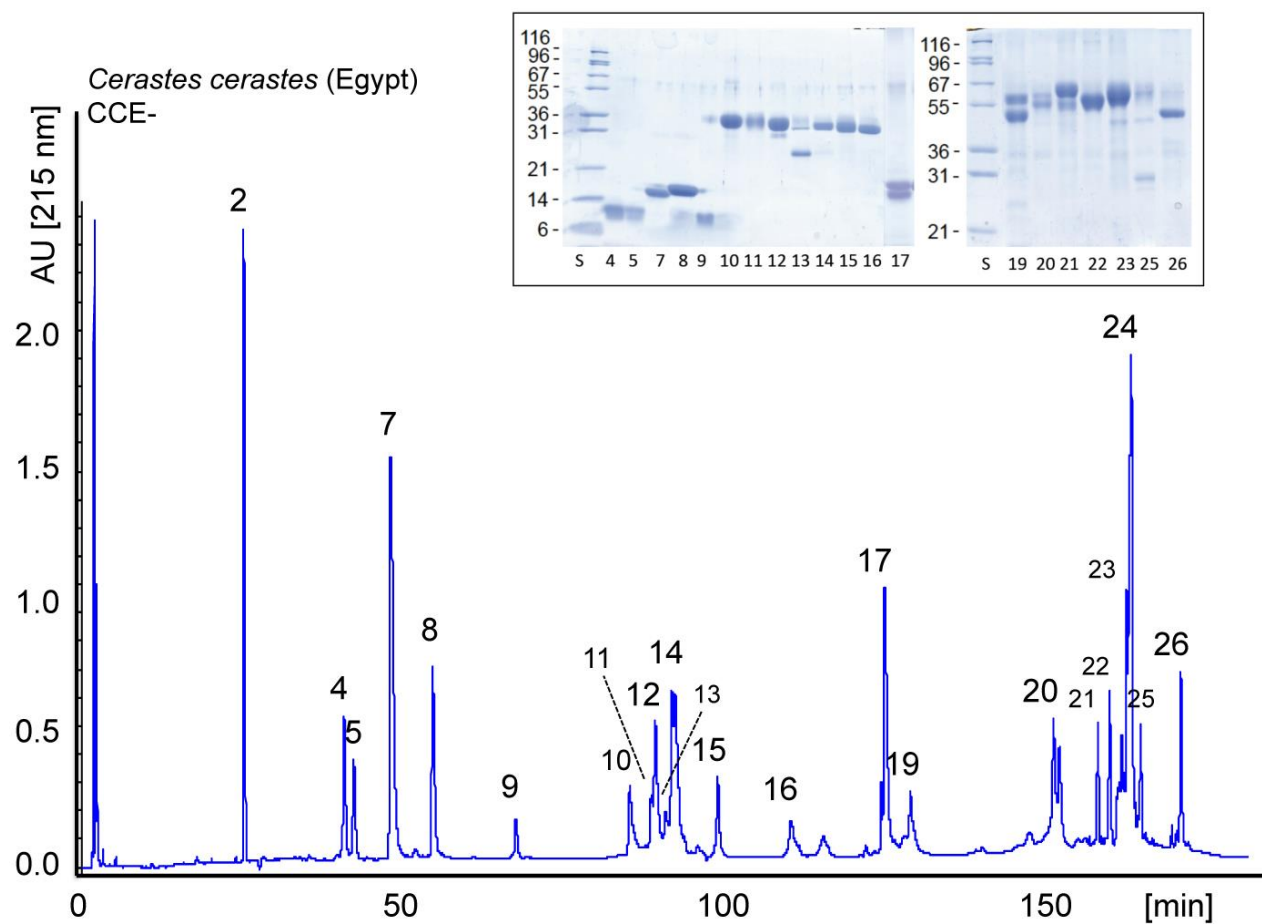

**Fig. S1. Reverse-phase HPLC separation of *Cerastes cerastes* (Egypt) venom proteins.** Insert, SDS-PAGE analysis of the isolated, numbered, protein fractions.

*Bitis arietans* (Nigeria)

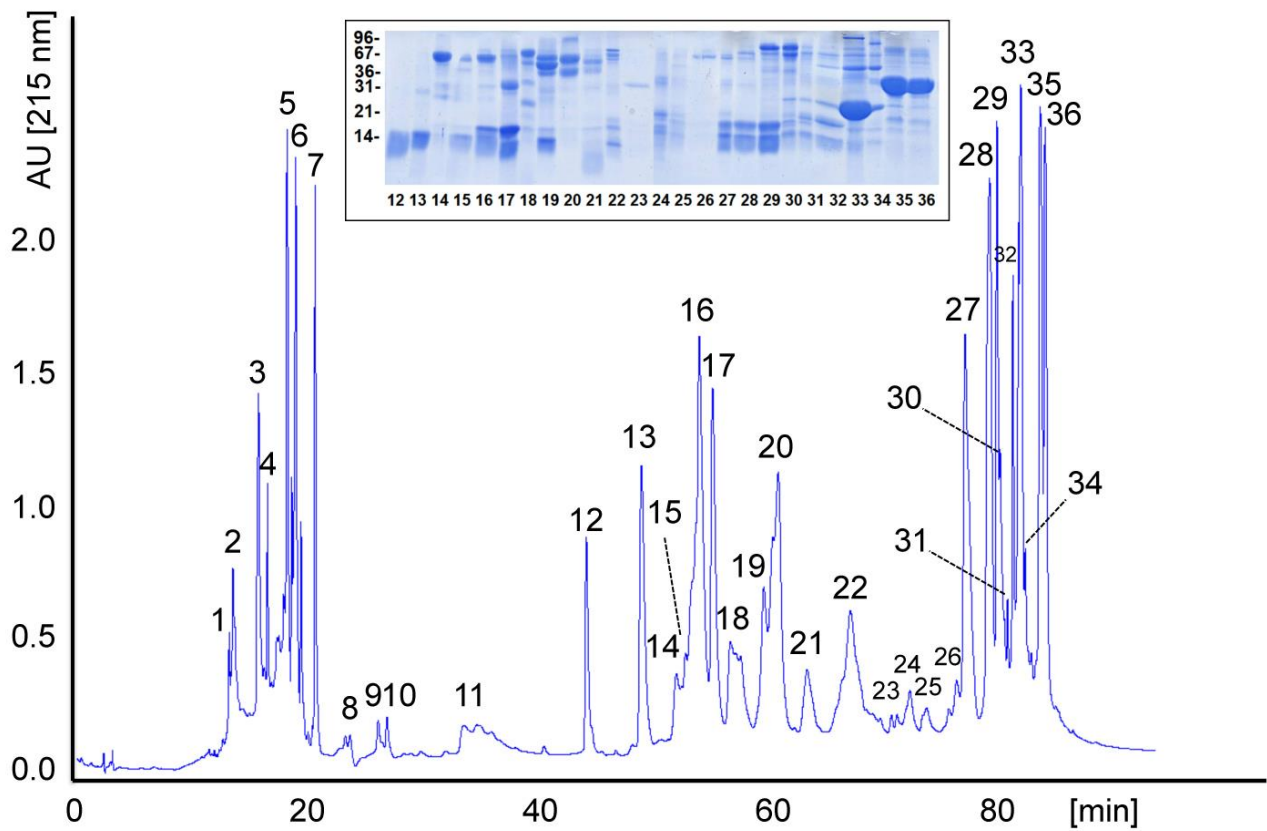

**Fig. S2. Reverse-phase HPLC separation of *Bitis arietans* (Nigeria) venom proteins. Insert, SDS-PAGE analysis of the isolated, numbered, protein fractions.**

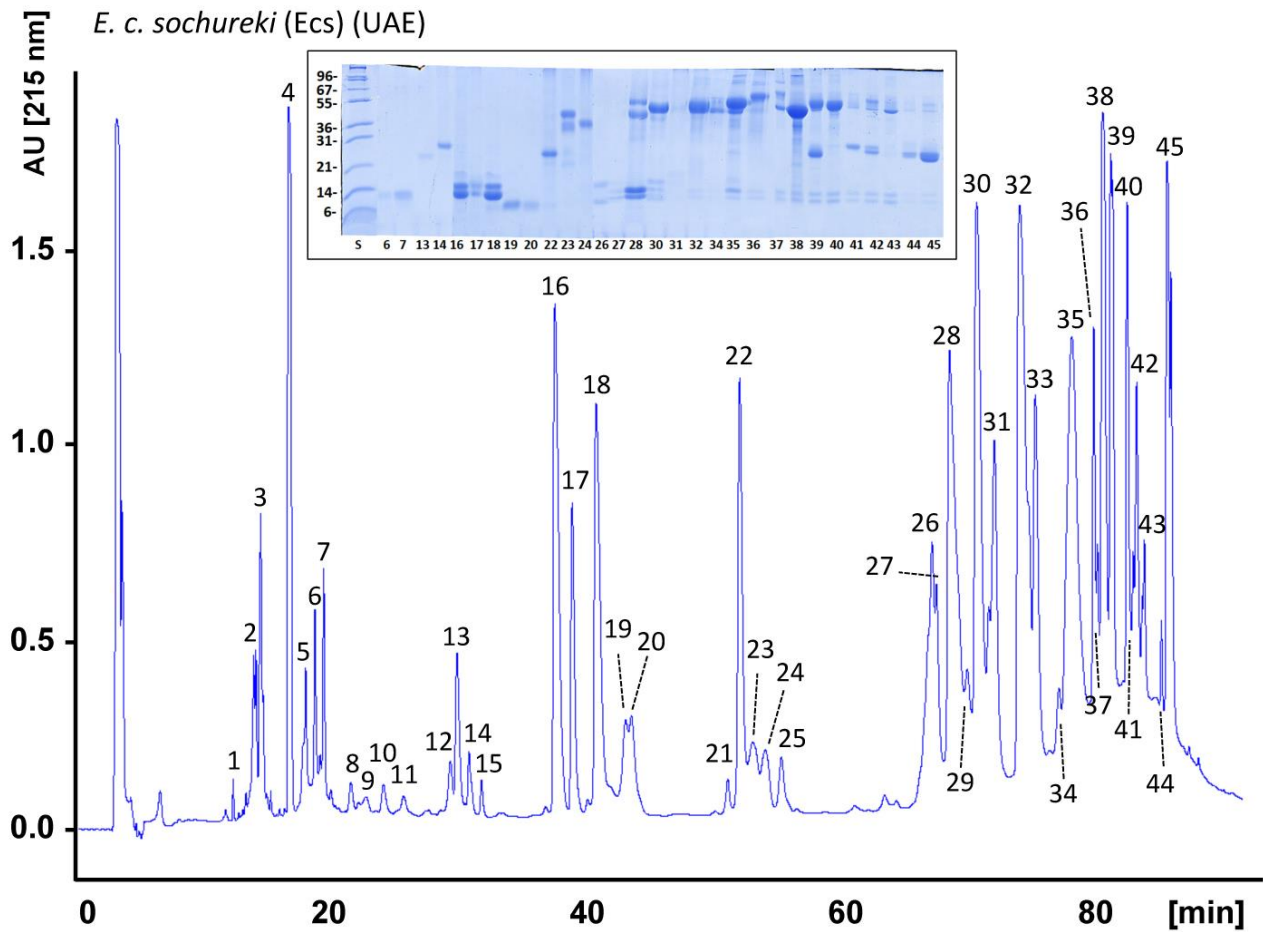

**Fig. S3. Reverse-phase HPLC separation of *Echis carinatus sochureki* (UAE) venom proteins. Insert, SDS-PAGE analysis of the isolated, numbered, protein fractions.**



*E. ocellatus* (Nigeria)

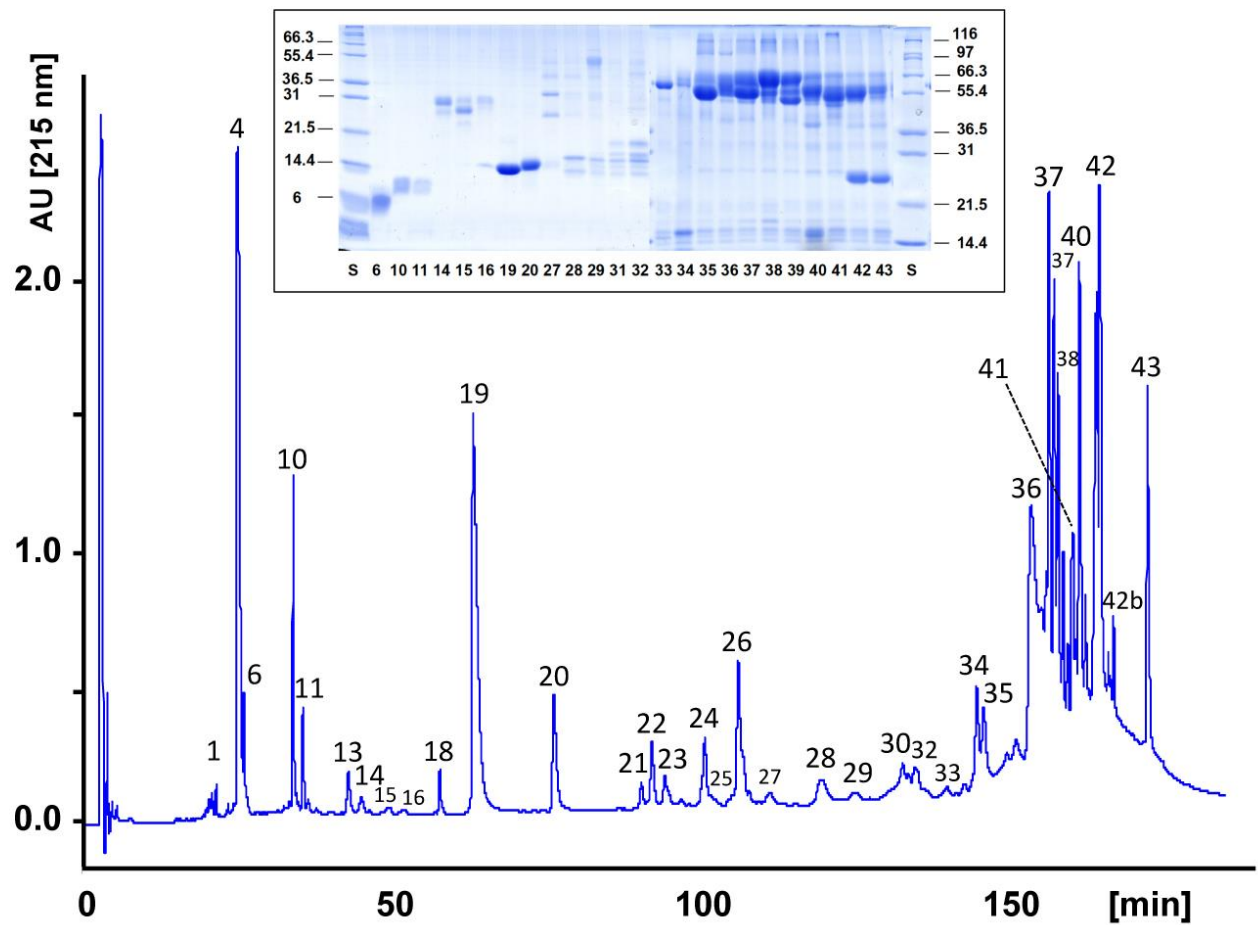

**Fig. S4.** Reverse-phase HPLC separation of *Echis ocellatus* (Nigeria) venom proteins. Insert, SDS-PAGE analysis of the isolated, numbered, protein fractions.

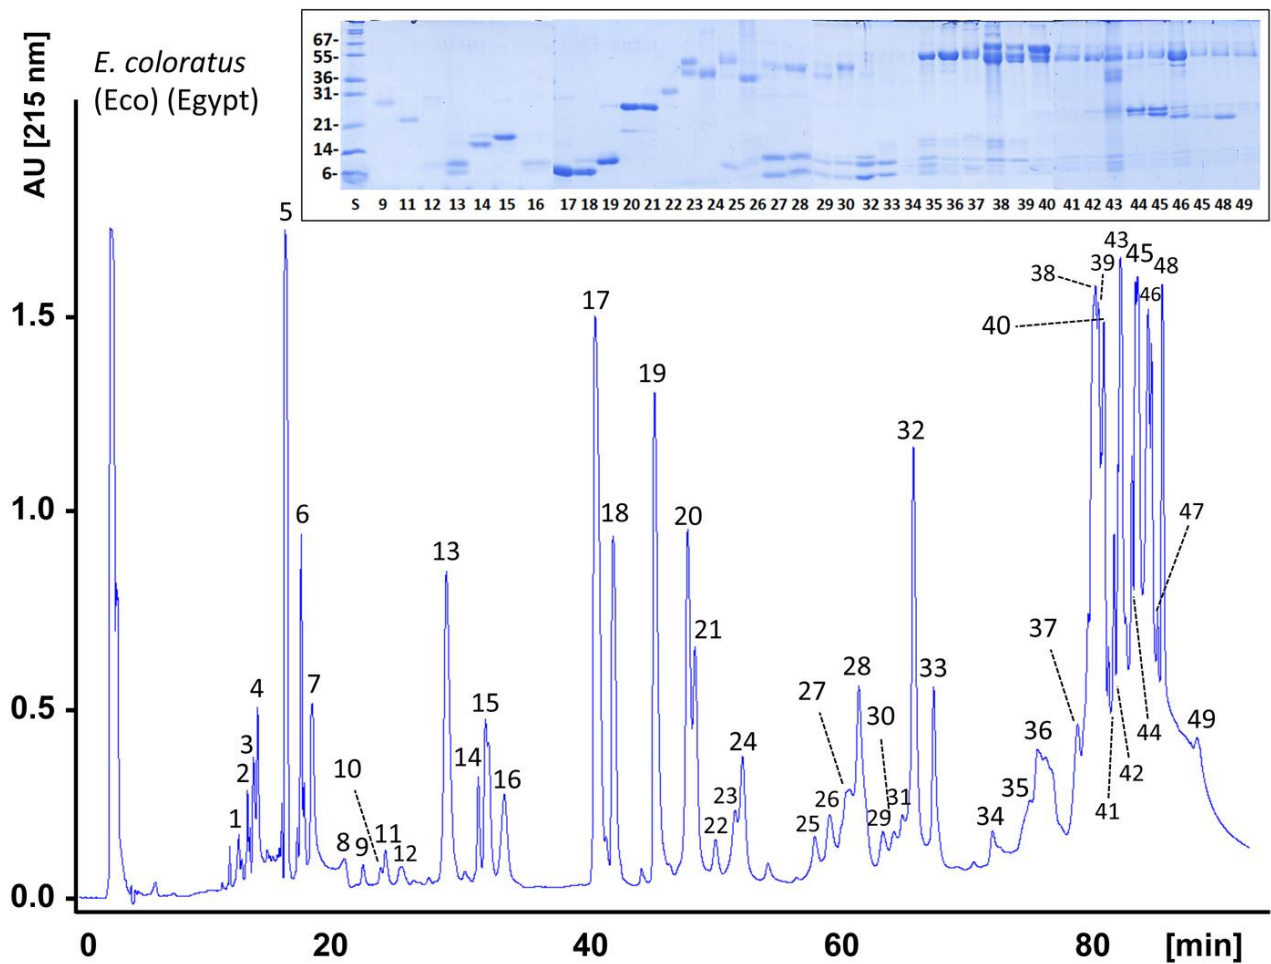

**Fig. S5. Reverse-phase HPLC separation of *Echis coloratus* (Egypt) venom proteins. Insert, SDS-PAGE analysis of the isolated, numbered, protein fractions.**

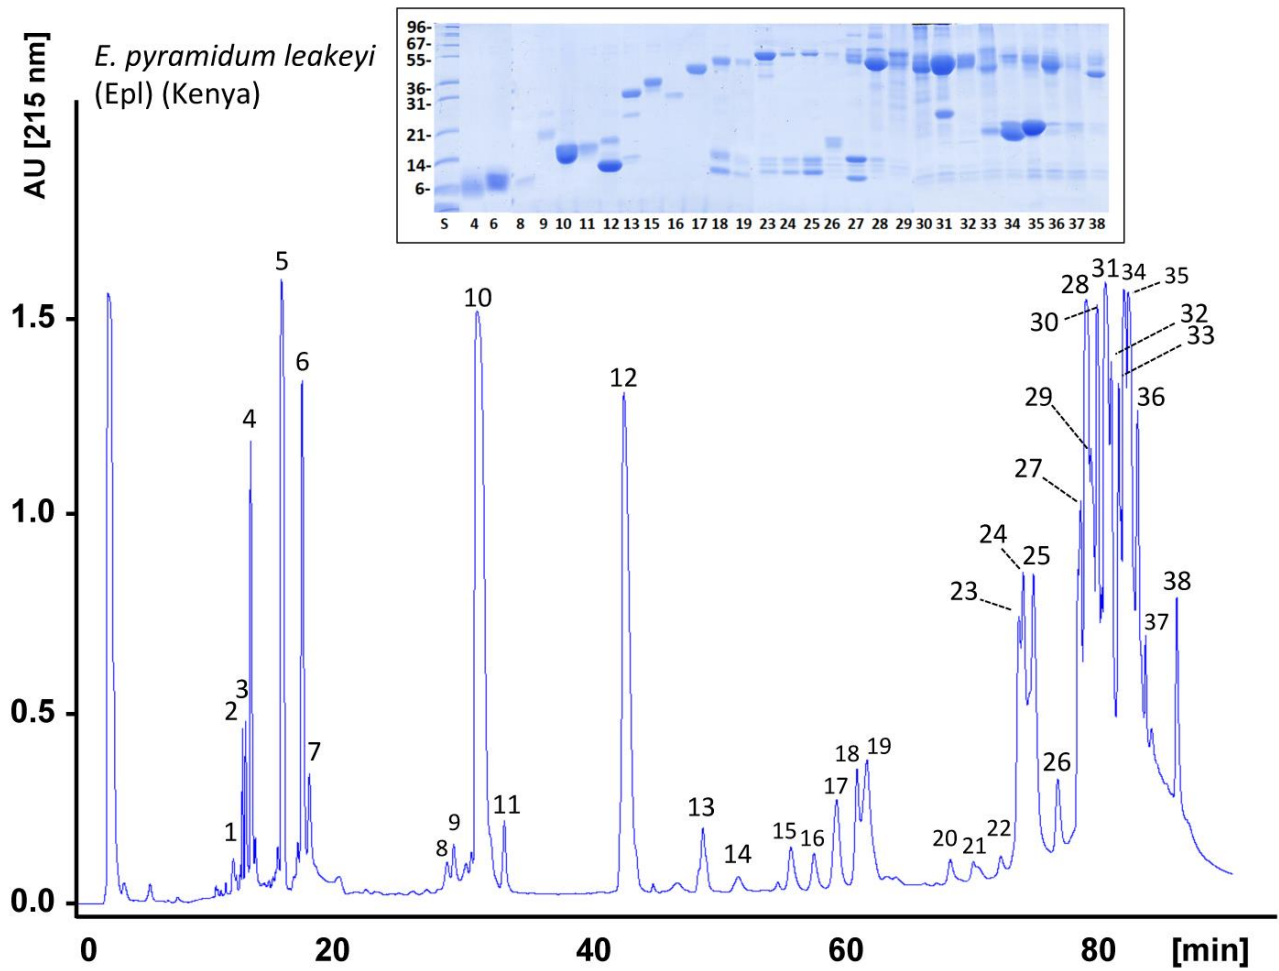

**Fig. S6. Reverse-phase HPLC separation of *Echis pyramidum leakeyi* (Kenya) venom proteins.** Insert, SDS-PAGE analysis of the isolated, numbered, protein fractions.

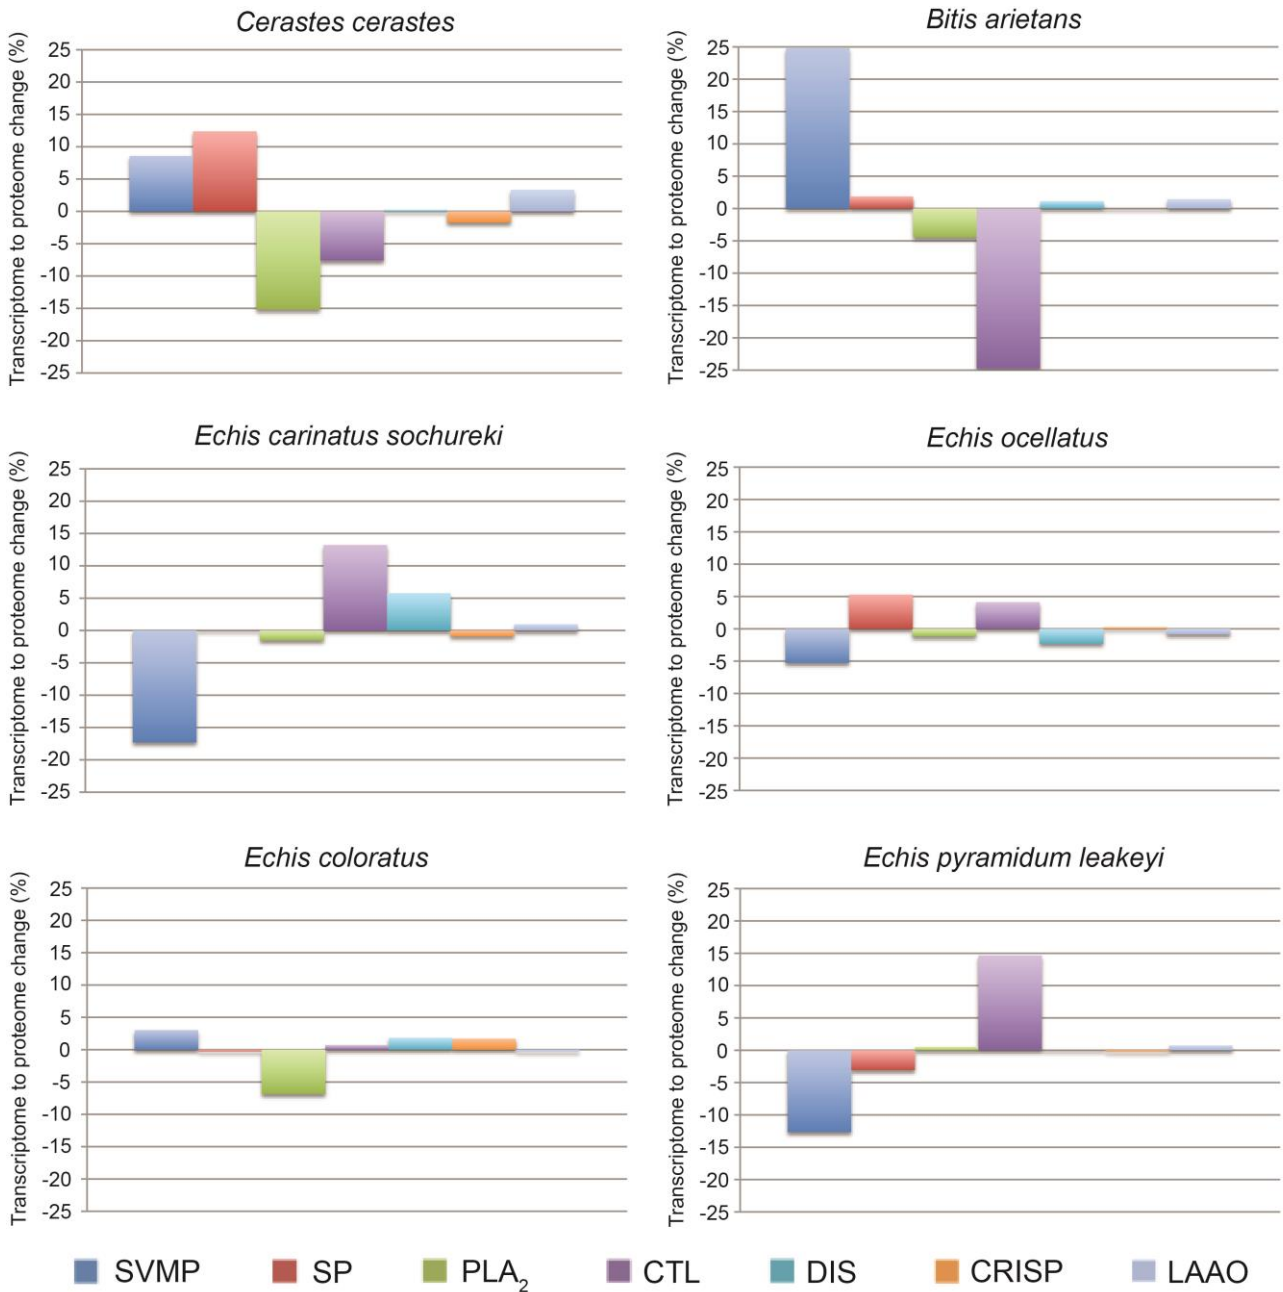

**Fig. S7.** The percentage change from gene expression to protein abundance for each toxin family identified in each species. Gene expression is calculated from venom gland transcriptome data and protein abundance from venom proteome data. Coloured bars represent the summation of net change in expression/abundance of all toxins encoded by each gene family for each of the species.

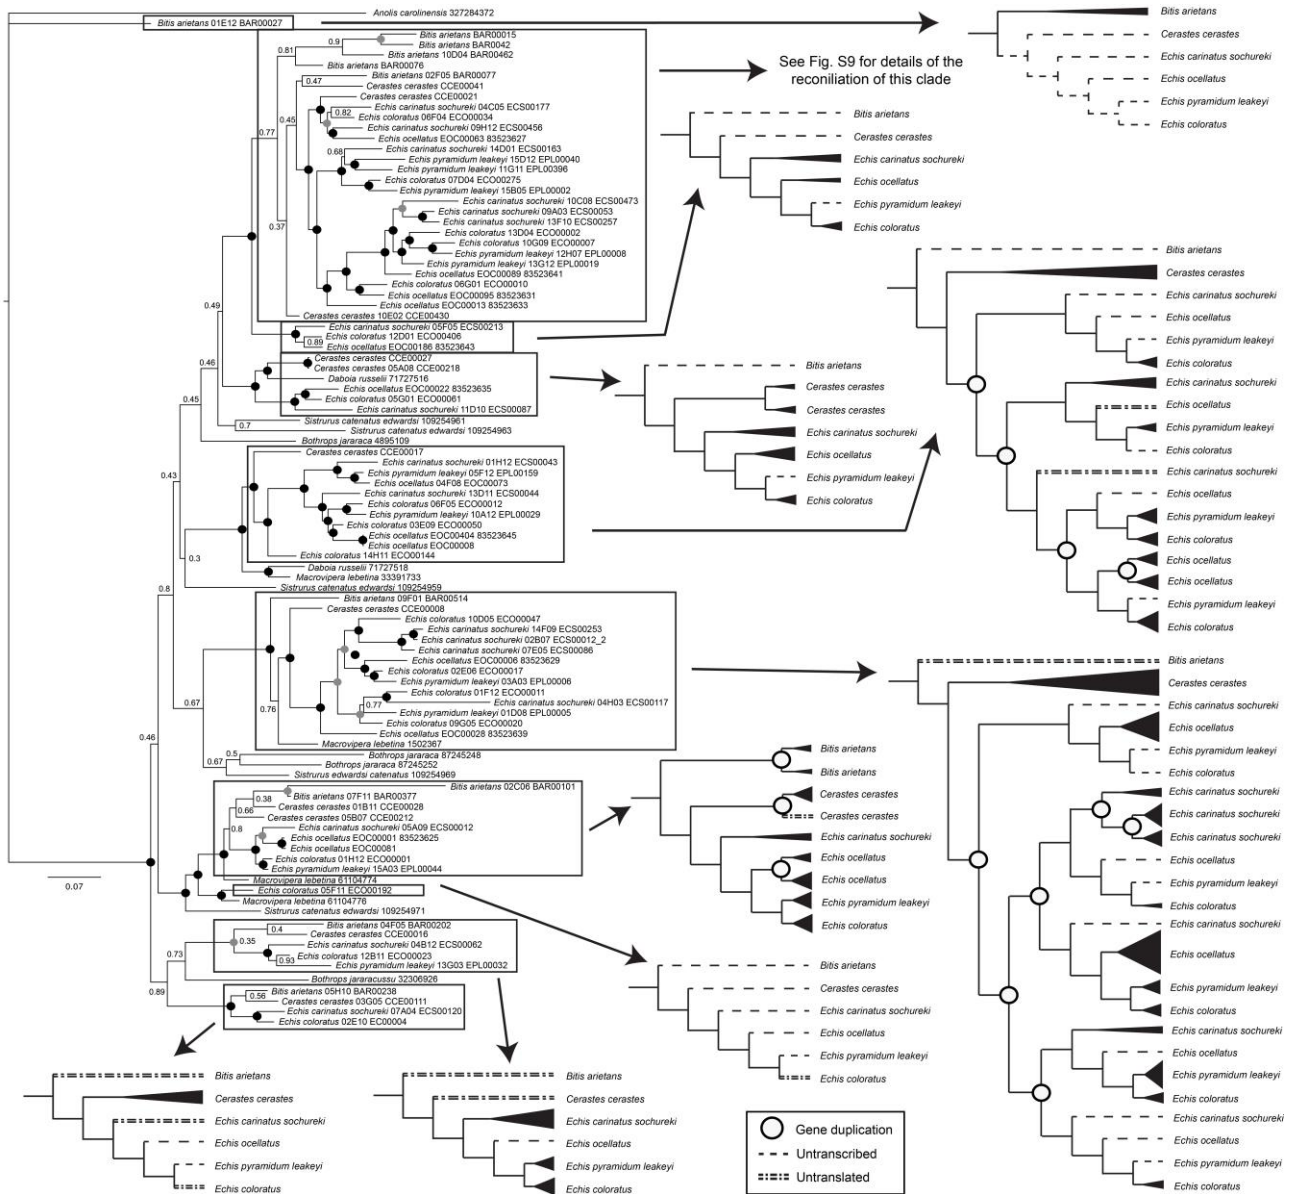

**Fig. S8.** The evolutionary history of the snake venom metalloproteinase (SVMP) toxin family. The gene tree on the left displays the reconstructed evolutionary history for the gene family. Black dots represent Bayesian posterior probabilities of 1.00; grey dots represent >0.95. Black boxes highlight clades of the gene tree containing *Bitis*, *Cerastes* and/or *Echis* toxins. Arrows next to each clade show the gene tree reconciled to the species phylogeny. The width of each branch in the reconciled tree represents the proteomic abundance of each toxin detected in each species. Bordered white circles represent inferred gene duplication events; dotted branches indicated inferred untranscribed loci; double dotted branches indicate genes that were expressed but untranslated.

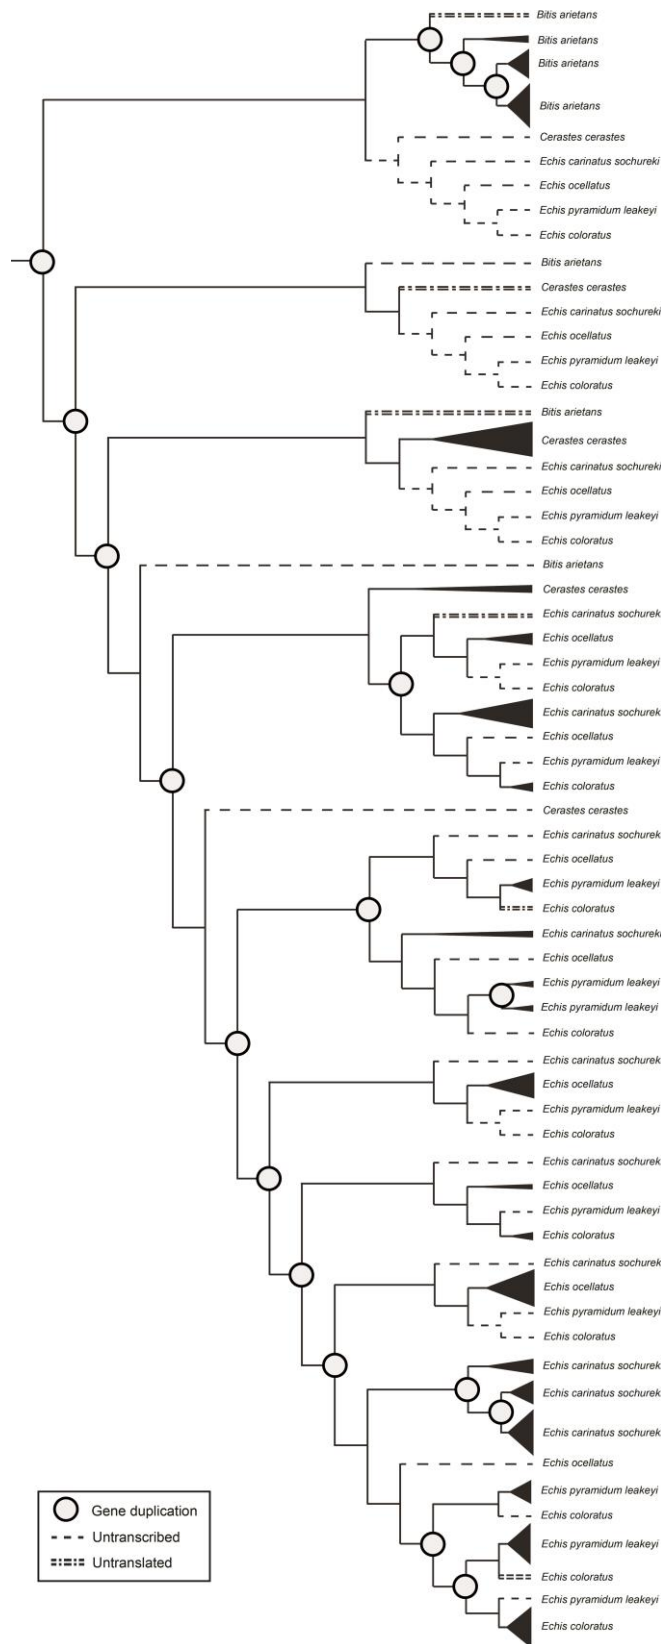

**Fig. S9. Gene tree/species tree reconciliation for a major clade of snake venom metalloproteinases displayed in Fig. S8.** The width of each branch in the reconciled tree represents the proteomic abundance of each toxin detected in each species. Bordered white circles represent inferred gene duplication events; dotted branches indicated inferred untranscribed loci; double dotted branches indicate genes that were expressed but untranslated.



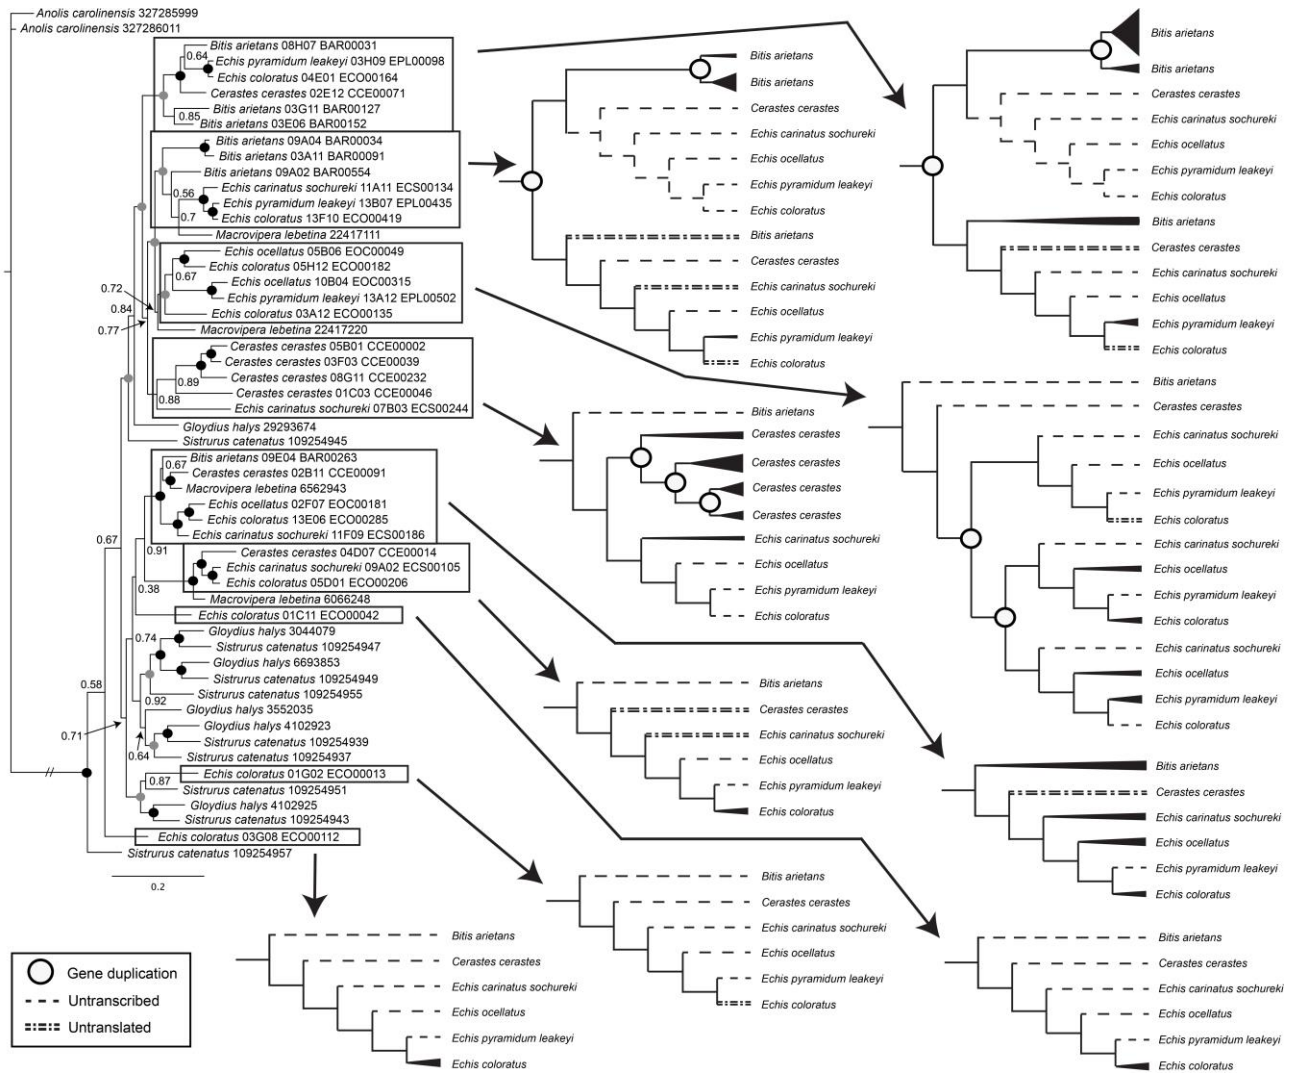

**Fig. S10. The evolutionary history of the serine protease (SP) toxin family.** The gene tree on the left displays the reconstructed evolutionary history for the gene family. Black dots represent Bayesian posterior probabilities of 1.00; grey dots represent >0.95. Black boxes highlight clades of the gene tree containing *Bitis*, *Cerastes* and/or *Echis* toxins. Arrows next to each clade show the gene tree reconciled to the species phylogeny. The width of each branch in the reconciled tree represents the proteomic abundance of each toxin detected in each species. Bordered white circles represent inferred gene duplication events; dotted branches indicated inferred untranscribed loci; double dotted branches indicate genes that were expressed but untranslated.

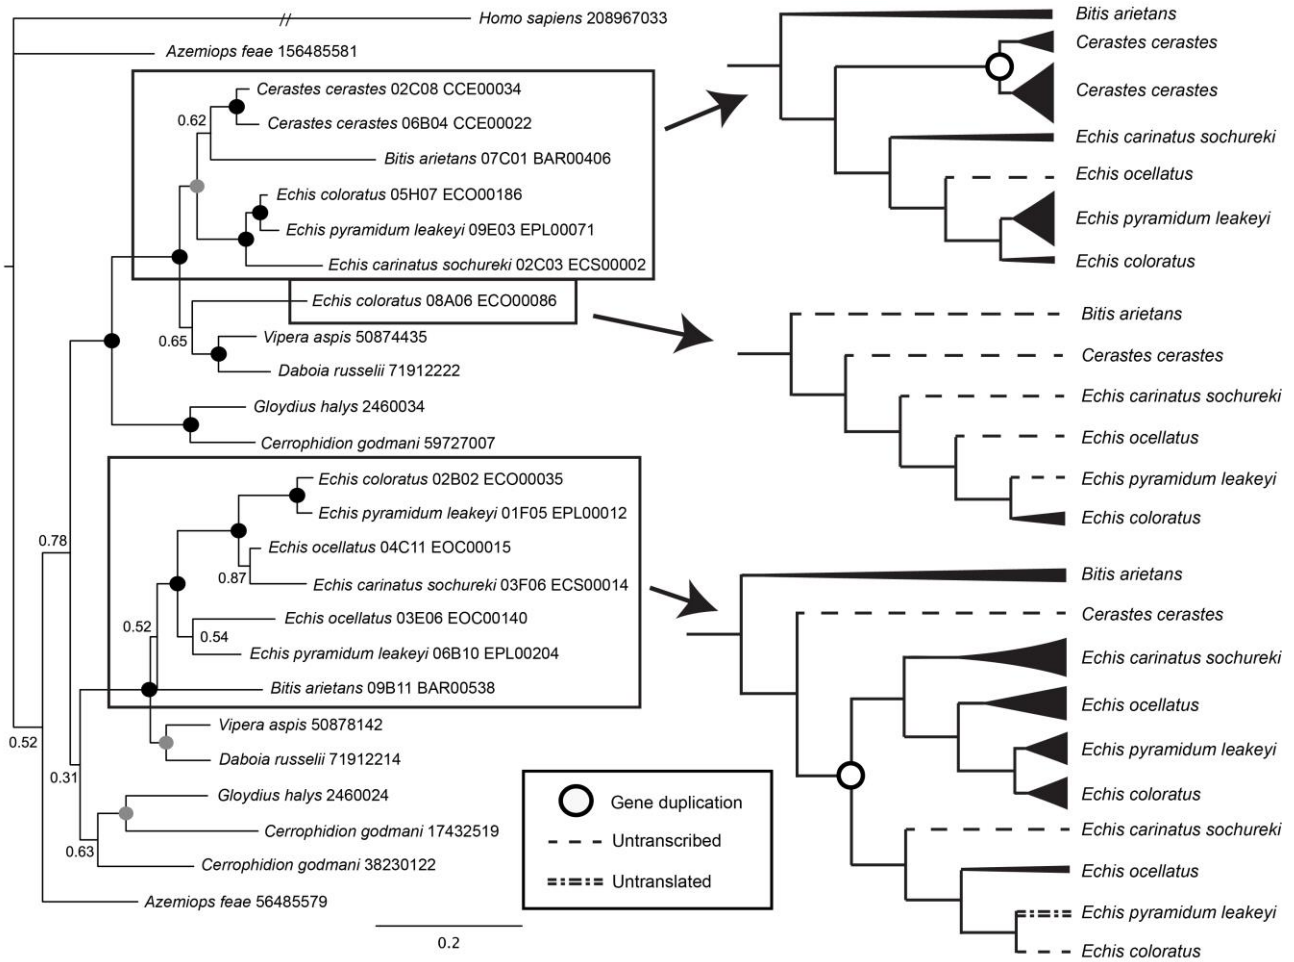

**Fig. S11. The evolutionary history of the phospholipase A<sub>2</sub> (PLA<sub>2</sub>) toxin family.** The gene tree on the left displays the reconstructed evolutionary history for the gene family. Black dots represent Bayesian posterior probabilities of 1.00; grey dots represent >0.95. Black boxes highlight clades of the gene tree containing *Bitis*, *Cerastes* and/or *Echis* toxins. Arrows next to each clade show the gene tree reconciled to the species phylogeny. The width of each branch in the reconciled tree represents the proteomic abundance of each toxin detected in each species. Bordered white circles represent inferred gene duplication events; dotted branches indicated inferred untranscribed loci; double dotted branches indicate genes that were expressed but untranslated.



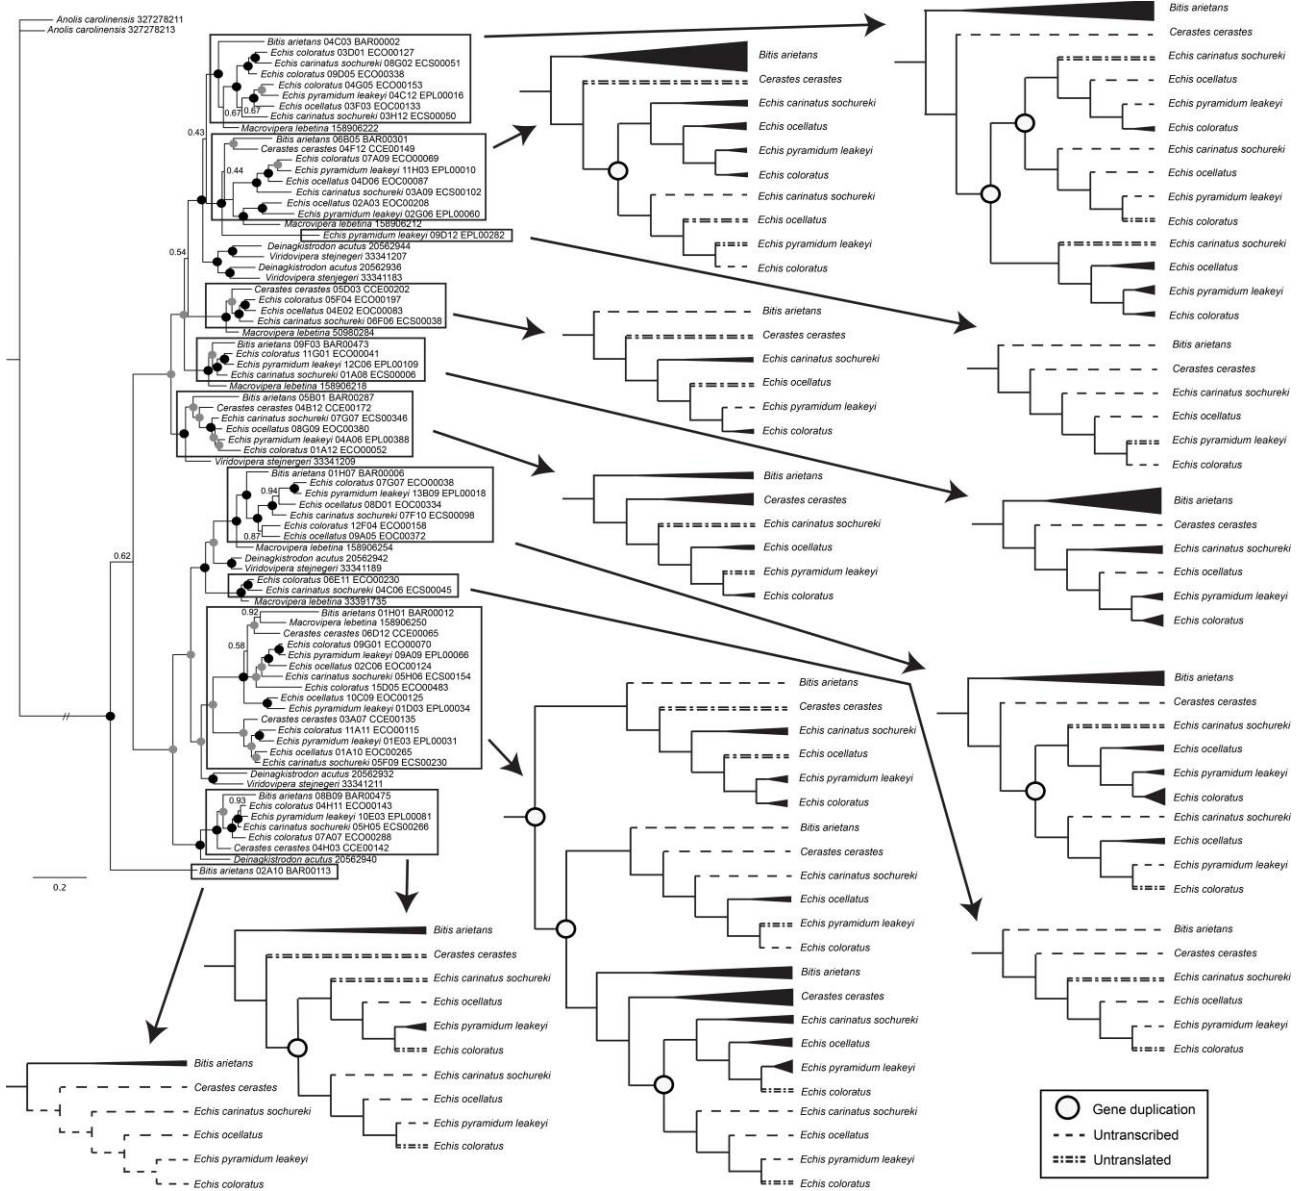

**Fig. S12.** The evolutionary history of the C-type lectin (CTL) toxin family. The gene tree on the left displays the reconstructed evolutionary history for the gene family. Black dots represent Bayesian posterior probabilities of 1.00; grey dots represent >0.95. Black boxes highlight clades of the gene tree containing *Bitis*, *Cerastes* and/or *Echis* toxins. Arrows next to each clade show the gene tree reconciled to the species phylogeny. The width of each branch in the reconciled tree represents the proteomic abundance of each toxin detected in each species. Bordered white circles represent inferred gene duplication events; dotted branches indicated inferred untranscribed loci; double dotted branches indicate genes that were expressed but untranslated.

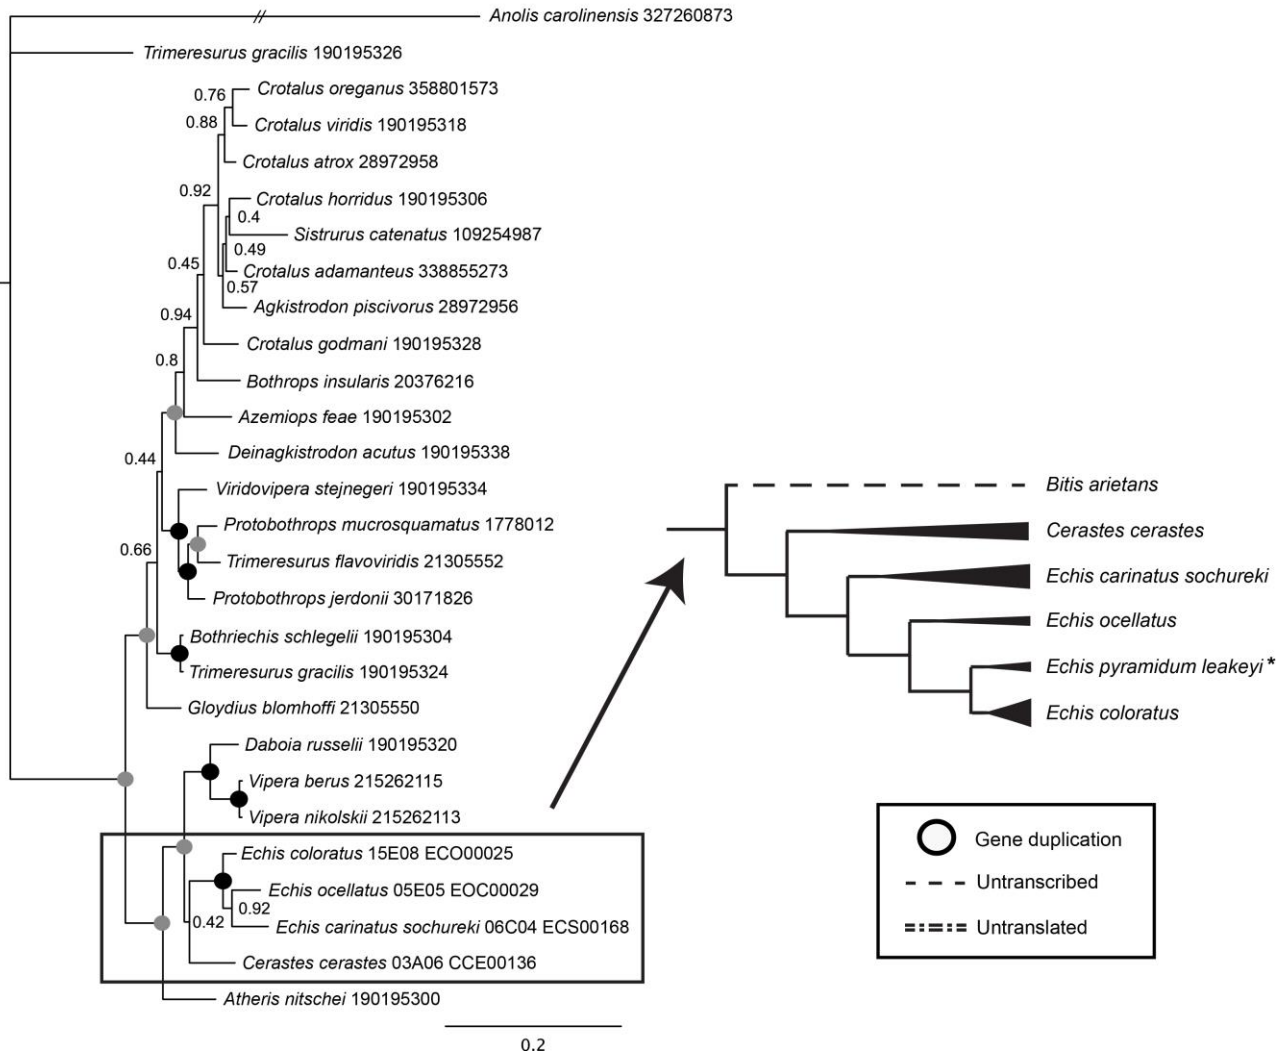

**Fig. S13. The evolutionary history of the cysteine rich secretory protein (CRISP) toxin family.** The gene tree on the left displays the reconstructed evolutionary history for the gene family. Black dots represent Bayesian posterior probabilities of 1.00; grey dots represent >0.95. Black boxes highlight clades of the gene tree containing *Bitis*, *Cerastes* and/or *Echis* toxins. Arrows next to each clade show the gene tree reconciled to the species phylogeny. The width of each branch in the reconciled tree represents the proteomic abundance of each toxin detected in each species. Bordered white circles represent inferred gene duplication events; dotted branches indicated inferred untranscribed loci; double dotted branches indicate genes that were expressed but untranslated. \* Note that this gene was not expressed in the venom gland transcriptome but was detected in the venom proteome. Its placement in the reconciled tree is based on proteomic similarity with the other *Echis* CRISPs and the absence of any paralogous genes recovered.

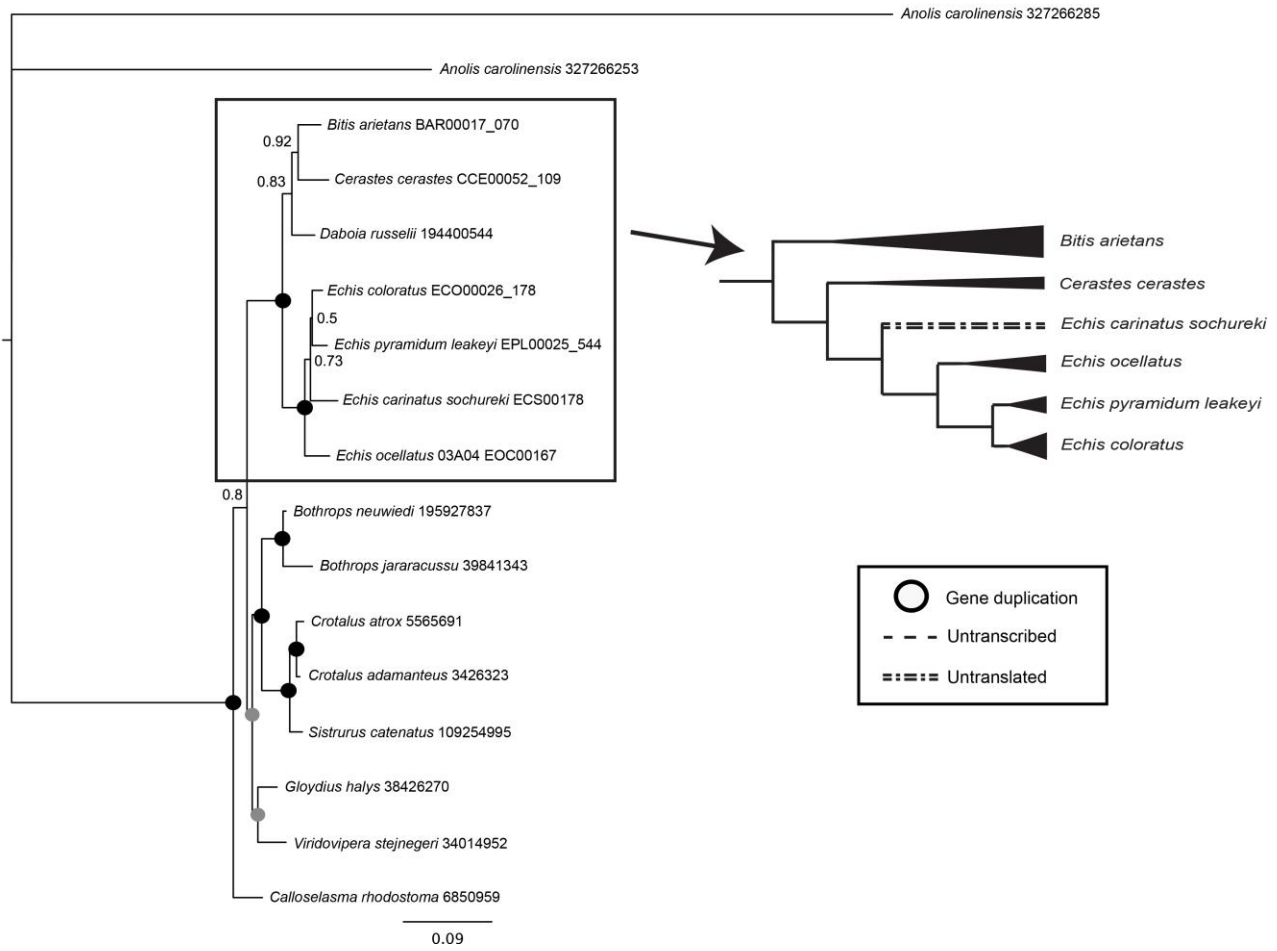

**Fig. S14. The evolutionary history of the L-amino acid oxidase (LAAO) toxin family.** The gene tree on the left displays the reconstructed evolutionary history for the gene family. Black dots represent Bayesian posterior probabilities of 1.00; grey dots represent >0.95. Black boxes highlight clades of the gene tree containing *Bitis*, *Cerastes* and/or *Echis* toxins. Arrows next to each clade show the gene tree reconciled to the species phylogeny. The width of each branch in the reconciled tree represents the proteomic abundance of each toxin detected in each species. Bordered white circles represent inferred gene duplication events; dotted branches indicated inferred untranscribed loci; double dotted branches indicate genes that were expressed but untranslated.

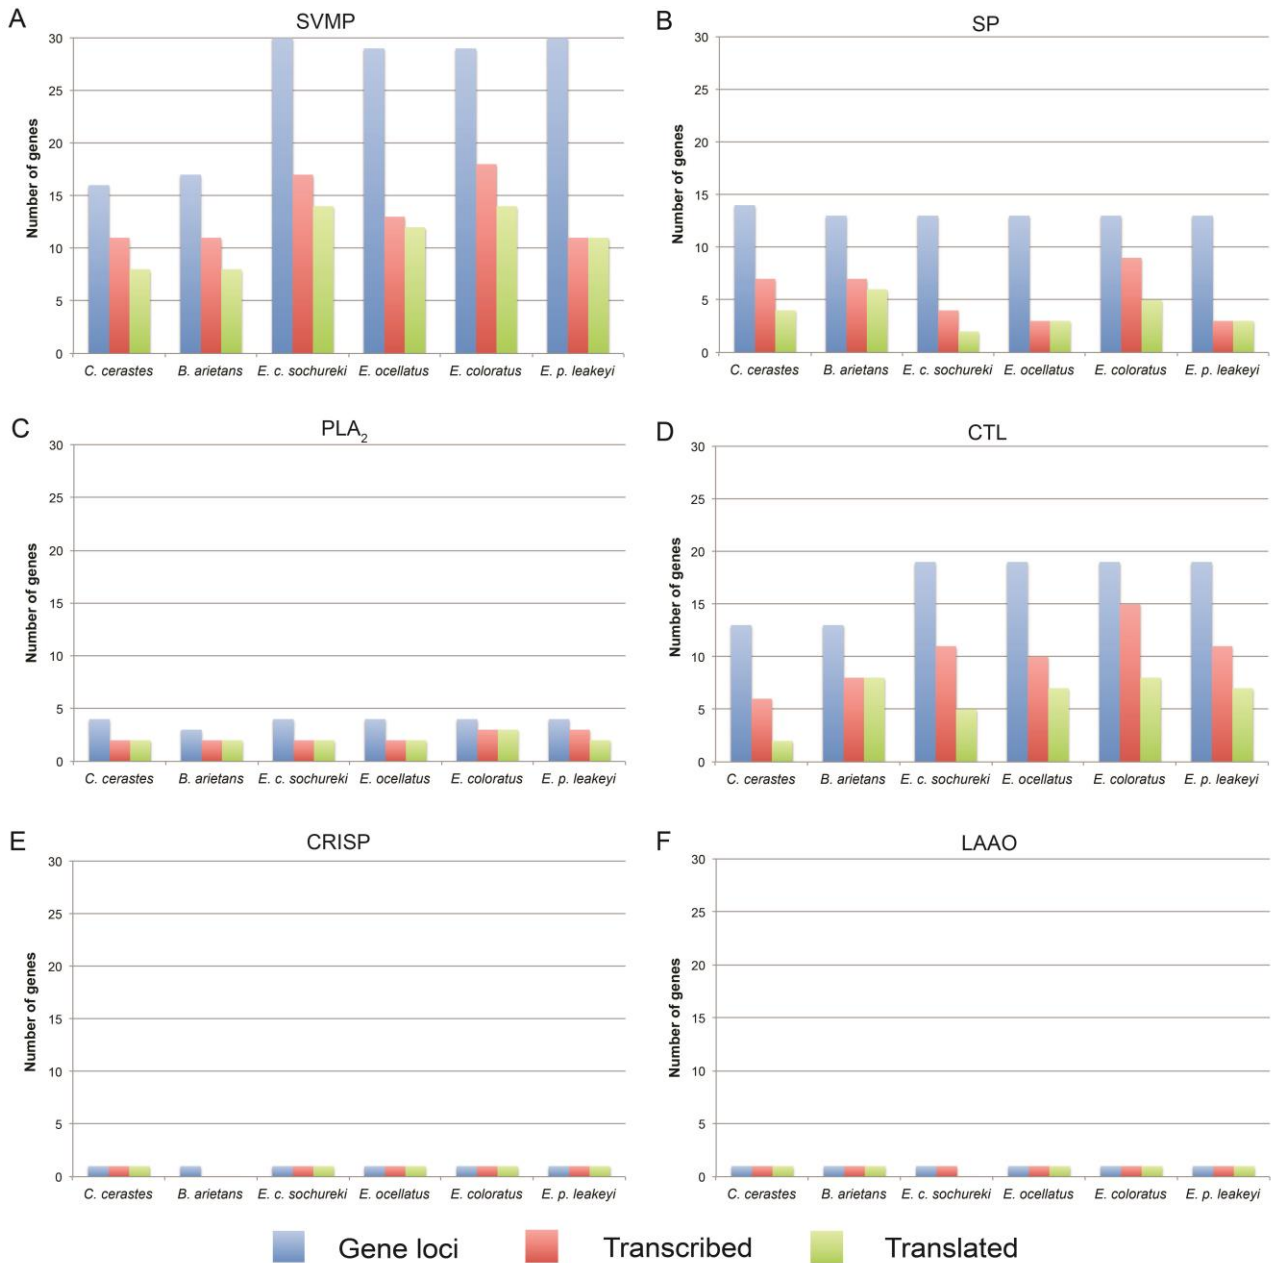

**Fig S15. Comparisons of the number of gene loci, genes transcribed and genes translated encoded by the different toxin families in each species.** A) snake venom metalloproteinases (SVMP); B) serine proteases (SP); C) phospholipase A2 (PLA<sub>2</sub>); D) C-type lectins (CTL); E) cysteine-rich secretory proteins (CRISP); F) L-amino acid oxidase (LAAO). Note that the y-axis has been standardised to emphasise the difference between large multi-locus and single-locus gene families. Single loci gene families exhibit a largely 1:1:1 ratio of gene:transcript:protein, whereas major discrepancies are observed in the multi-locus gene families.

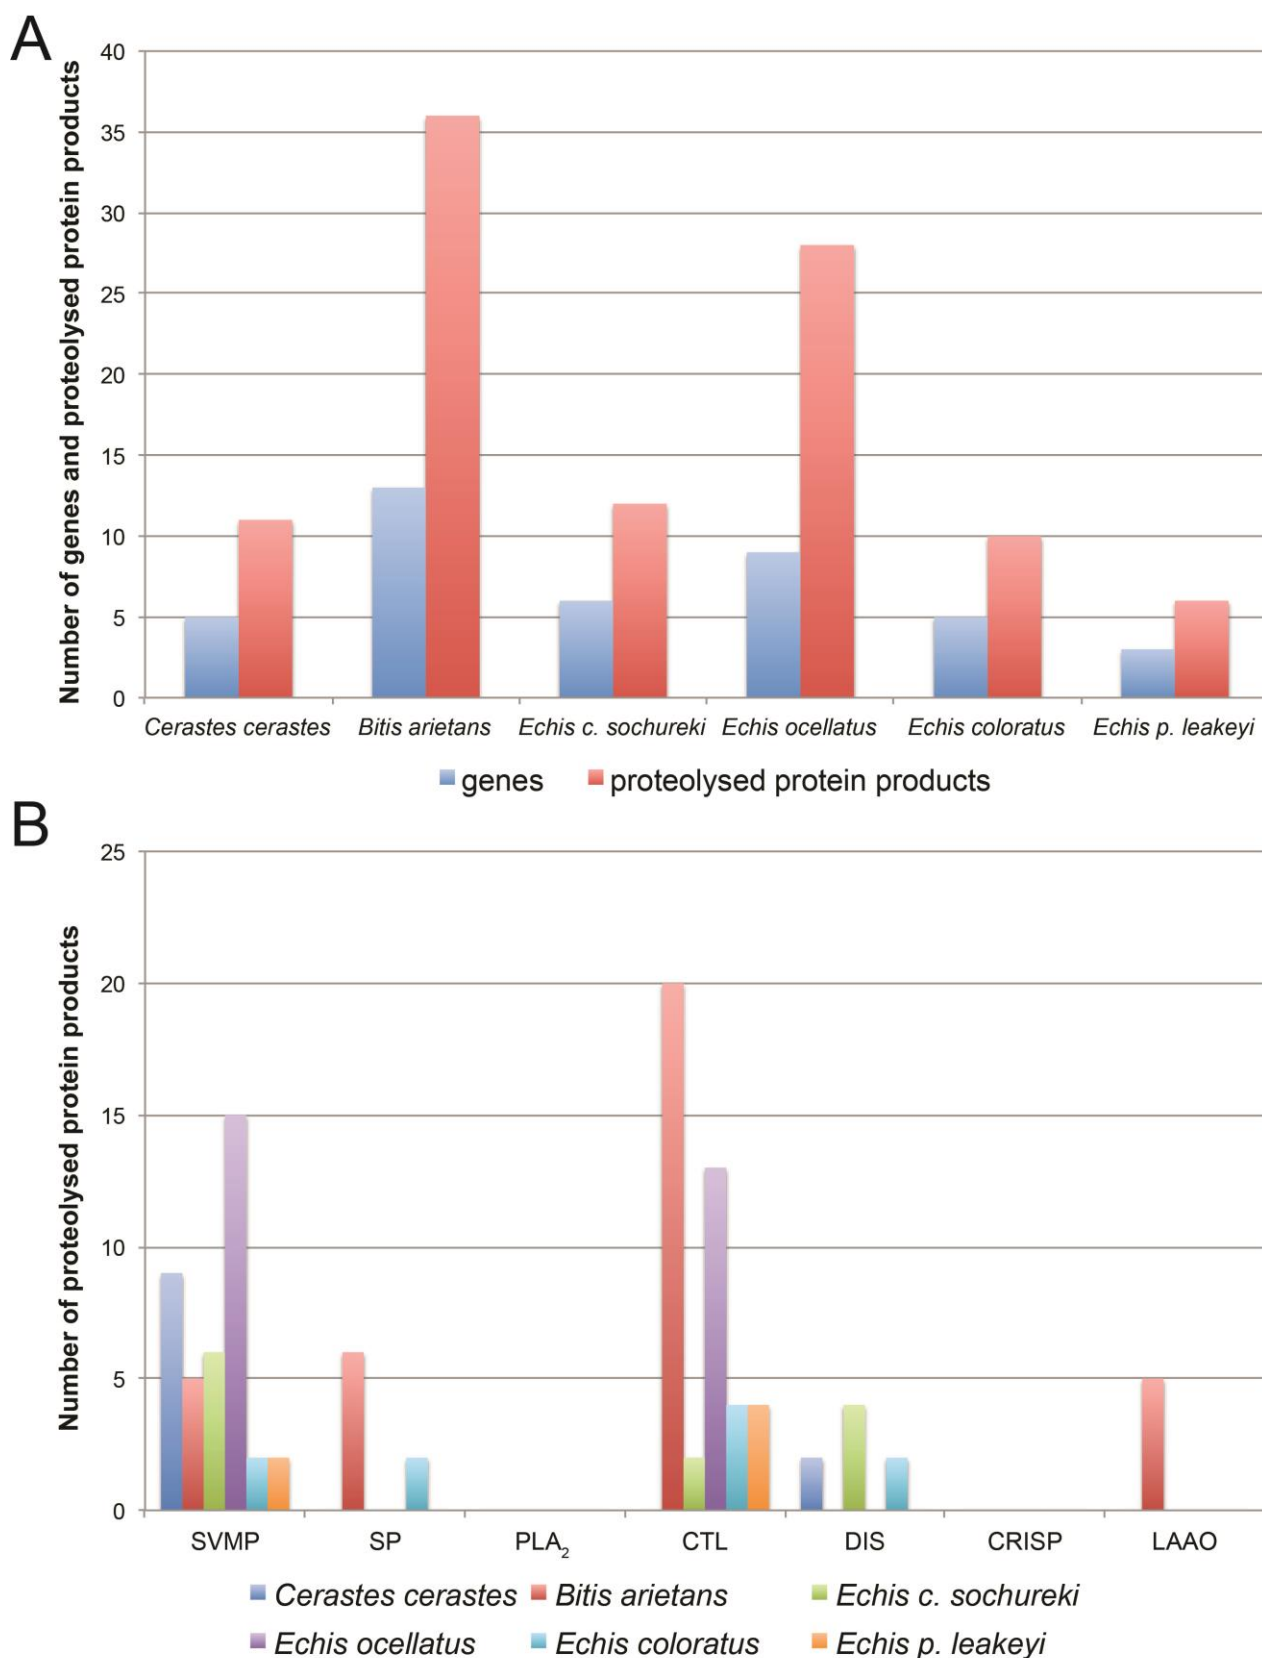

**Fig. S16. Quantification of post-translationally proteolysed toxins.** A) A comparison of the number of venom toxin genes detected in each species that show evidence of producing post-translationally proteolysed protein products (blue bars) and the number of proteolysed protein products that these genes produced (red bars). B) A comparison of the number of proteolysed proteins produced by each toxin gene family for each species.

## 3. SI TABLES

**Table S1.** Assignment of reverse-phase fractions from the venom of *Cerastes cerastes* (Cce) (Egypt) to known protein families.

| Spot ID     | Mass % | Mass     | m/z                                  | z                    | MS/MS or N-terminal (Nt-)-derived sequences                                                                 | Protein ID |                         | Protein family          |
|-------------|--------|----------|--------------------------------------|----------------------|-------------------------------------------------------------------------------------------------------------|------------|-------------------------|-------------------------|
|             |        |          |                                      |                      |                                                                                                             | NCBI       | CCE-                    |                         |
| <b>CCE-</b> |        |          |                                      |                      |                                                                                                             |            |                         |                         |
| 2           | 9.5    |          | 444.4                                | 1+                   | ZKW                                                                                                         |            | 00297<br>00012<br>00063 | SVMPi                   |
| 4           | 3.5    | 8 kDa    | 654.9                                | 3+                   | Nt<br>GDDMNDYCTGISSDCPR<br>NSAHPCCDPVTCKPK                                                                  | P83041     | 00007                   | Dimeric disintegrin CC5 |
| 5           | 2.8    | 8 kDa    | 654.9                                | 3+                   | Nt<br>GDDMNDYCTGISSDCPR<br>NSAHPCCDPVTCKPK                                                                  | P83041     | 00007                   | Dimeric disintegrin     |
| 7           | 12.9   | 15 kDa   | 991.5<br>2968.3<br>1533.1            | 2+<br>1+<br>1+       | Nt<br>FENQDIICGDEDPCNR<br>SALLSYSAYGCYCGWGGQGKPKQDATDR<br>CCFVHDCCYGR<br>NLYQFGKMIKHKTGK                    | ACO92622   | 00022                   | D49-PLA <sub>2</sub>    |
| 8           | 4.7    | 15.5 kDa | 1828.9<br>1533.1<br>2968.3<br>1700.8 | 1+<br>1+<br>1+<br>1+ | Nt<br>NLFQFGKMIKHKTGK<br>VAAICFGENVNTYDKK<br>CCFVHDCCYGR<br>SALLSYSAYGCYCGWGGQGKPKQDATDR<br>VAAICFGENVNTYDK | ACO92623   | 00034                   | D49-PLA <sub>2</sub>    |
| 9           | 1.1    | 7 kDa    |                                      |                      | Nt<br>NSAHPCCDPVTCKPK                                                                                       | P83043     | 00007                   | Dimeric disintegrin CC8 |

|       |     |          |                                   |  |    |                                                                                                                            |         |                                                          |
|-------|-----|----------|-----------------------------------|--|----|----------------------------------------------------------------------------------------------------------------------------|---------|----------------------------------------------------------|
| 10    | 3.2 | 33 kDa   |                                   |  | Nt | VIGGAECNINEHRSL<br>734.8 2+<br>VIGGAECNINEHR<br>578.3 2+<br>IYLGLHHFR<br>607.8 2+<br>VFDYTDWIR<br>1160.6 1+<br>IMGWGAITSPK | ~Q7SYF1 | 00232 Serine proteinase<br><br>00002 Serine proteinase   |
| 11,12 | 4.9 | 33 kDa   | 3687.9 1+<br>734.8 2+<br>578.3 2+ |  |    | GDSGGPLICNGQIQGIVSWGDEVCGKPNKPGVYTK<br>VIGGAECNINEHR<br>IYLGLHHFR                                                          | ~Q7SYF1 | 00039 Serine proteinase                                  |
| 13    | 1.7 | 24 kDa   |                                   |  | Nt | SVDFDSESPRKPEIQ                                                                                                            |         | 00136 CRISP                                              |
| 14    | 6.3 | 32 kDa   |                                   |  | Nt | VIGGAECNINEHPFL<br>IYLGLHHFR<br>SLVFLYNSSR<br>VIGGAECNINEHR<br>VLSAAHCDGENMKIYLGLHHFRLPNKDRQIR                             | Q75YF1  | 00232 Serine proteinase                                  |
| 15    | 2.6 | 31.5 kDa |                                   |  | Nt | VVGGDECNINEHQSL                                                                                                            |         | 00046 Serine proteinase                                  |
| 16    | 1.8 | 31 kDa   |                                   |  | Nt | VVGGDECNINEHRSL                                                                                                            |         | 00051 Serine proteinase                                  |
| 17    | 9.1 | 15 kDa   |                                   |  | Nt | DQDCLPGWSYEEK<br>TADNQWXR<br>YELVWIGLR<br>DFDCPSDWSAYDQYCYR                                                                |         | 00065 C-type lectin-like<br><br>00172 C-type lectin-like |
|       |     | 17 kDa   | 502.7 2+<br>575.3 2+<br>749.9 3+  |  |    |                                                                                                                            |         |                                                          |
| 19    | 2.6 | 55 kDa   | 727.3 3+                          |  |    | LYEIVNTVNEMYLPLNVR                                                                                                         |         | 00017 PIII-SVMP                                          |
| 20    | 0.9 | 56 kDa   | 626.8 2+                          |  |    | SAGQLYQESLR                                                                                                                |         | 00052 LAO                                                |
|       | 2.9 | 52 kDa   | 913.8 3+<br>505.8 2+              |  |    | DECDXPEHCTGQSAECPSDXTR<br>GSYFGYCR                                                                                         |         | 00017 PIII-SVMP<br>PIII-SVMP                             |

|    |      |        |        |    |                                      |          |              |
|----|------|--------|--------|----|--------------------------------------|----------|--------------|
| 21 | 1.0  | 66 kDa | 691.8  | 2+ | VPLVGLEIWSNR                         | 00021    | PIII-SVMP    |
|    | 1.3  | 52 kDa | 691.6  | 3+ | NLLVAITMAHELGHNLGLR                  | 00218    | PIII-SVMP    |
| 22 | 3.0  | 58 kDa | 702.8  | 2+ | VALIGLEFWSNR                         | 00041    | PIII-SVMP    |
|    |      |        | 514.9  | 2+ | IPACEPDVK                            |          |              |
| 23 | 3.5  | 59 kDa | 557.8  | 2+ | ZFILTPEQR                            | 00111    | PIII-SVMP    |
|    |      |        | 652.8  | 2+ | LVIVVDNVMFR                          |          |              |
|    | 0.8  | 56 kDa | 667.1  | 2+ | YSTGIVQDHSTR                         | ~00017   | PIII-SVMP    |
|    |      |        | 678.7  | 2+ | VALVGLEIWSNR                         | 00027    | PIII-SVMP    |
| 24 | 14.1 | 58 kDa | 702.8  | 2+ | VALIGLEFWSNR                         | 00041    | PIII-SVMP    |
|    |      |        | 651.1  | 2+ | NEYQTYLTNR                           | 00008/61 | PII-SVMP     |
|    |      |        | 1663.8 | 1+ | FLTAGTVCLPARGDW                      |          |              |
|    |      |        | 3868.7 | 1+ | VAATMAHEIGHNLGMNHDGNQCNCGANGCVMAGMLR |          |              |
| 25 | 2.1  | 56 kDa | 764.3  | 2+ | ATVAQDACFQFNR                        | 00212    | PIII-SVMP    |
|    |      |        | 580.1  | 2+ | CECCDQCK                             |          |              |
|    |      |        | 521.8  | 2+ | IPCAPEDIK                            |          |              |
|    | 0.2  | 23 kDa | 651.1  | 2+ | NEYQTYLTNR                           | 00008/61 | PI(PII)-SVMP |
|    |      |        | 1707.6 | 1+ | GEHCISGPCCENCK                       |          |              |
|    |      |        | 1352.7 | 1+ | NPQCILNQPLR                          |          |              |
|    |      |        | 1701.9 | 1+ | YIELVIVADHAMVTK                      |          |              |
|    |      |        | 1417.6 | 1+ | AQPSYQFSDCSK                         |          |              |
|    |      |        | 1301.6 | 1+ | NEYQTYLTNR                           |          |              |
| 26 | 3.5  | 48 kDa | 764.3  | 2+ | ATVAQDACFQFNR                        | 00212    | PIII-SVMP    |
|    |      |        | 566.3  | 2+ | LGNQYGYCR                            | 00212    | PIII-SVMP    |
|    |      |        | 651.3  | 2+ | NEYQTYLTNR                           | 00008/61 | PII-SVMP     |



Protein assignment undertaken by MALDI-TOF-TOF- and nESI- CID-MS/MS of peptide ions obtained from in-gel digested protein bands separated by SDS-PAGE. X = Ile or Leu; Z, pyroglutamic acid; M<sub>ox</sub>, methionine sulphoxide. Cysteine residues are carbamidomethylated. Nt, N-terminal sequence determined by automated Edman degradation. Apparent molecular masses (in kDa) were estimated from SDS-PAGE analysis of reduced samples.

**Table S2.** Assignment of reverse-phase fractions from the venom of *Bitis arietans* (Bar) (Nigeria) to known protein families.

| Spot ID     | Spot % | Mass                              | m/z                     | z              | MS/MS or N-terminal (Nt-)-derived sequences | Mascot score | Protein ID NCBI | Protein ID BAR- | Protein family   |
|-------------|--------|-----------------------------------|-------------------------|----------------|---------------------------------------------|--------------|-----------------|-----------------|------------------|
| <b>BAR-</b> |        |                                   |                         |                |                                             |              |                 |                 |                  |
| 1, 2        | 0,2    |                                   | 568.4                   | 2+             | ZRPPGHHIP                                   | de novo      |                 | BA00003         | BPP/pGpH         |
| 3,4         | 0,7    |                                   | 649.0                   | 2+             | (223.1)RPPRPQIPP                            | de novo      |                 | BA00003         | BPP/pGpH         |
| 5           | 1,3    |                                   | 585.0                   | 2+             | (268.3)PPMPMG(291.1)                        | de novo      |                 |                 | unknown          |
| 6           | 1.2    |                                   | 431.1                   | 1+             | ZDW                                         | de novo      |                 | BA00003         | SVMP inhibitor   |
| 7           | 2,3    | 8891                              |                         |                | Nt: SPPVCGNKILEQGED                         |              | P17497          | BA00042         | SVMP disintegrin |
| 8,9,10      | 1,1    | 8-9 kDa                           |                         |                | Nt: SPPVCGNKILEQGED                         |              | P17498          | BA00042         | SVMP disintegrin |
| 12          | 2.2    | 14 <sup>■</sup> kDa               | 522,3<br>494,2          | 2+<br>2+       | EMIDHVSGR<br>GKPQDATDR                      |              | AAR06850        | BA00406         | D49-PLA2         |
| 13          | 3,1    | 14 <sup>■</sup> kDa               | 404,7<br>412,7<br>486,8 | 2+<br>2+<br>2+ | ICECDK<br>AAAICFR<br>GKPIDATDR              |              | AAX86635        | BA00538         | D49-PLA2         |
| 14,15,16    | 0,9    | 60 <sup>■</sup> /150 <sup>■</sup> | 494,7<br>466,7          | 2+<br>2+       | ATYWYER<br>YFCLSSR                          |              | CBM40647        | BA00034         | Serine protease  |
| 14          | 1,1    | 60 <sup>■</sup> /150 <sup>■</sup> | 607,8                   | 2+             | VFDYTDWIR                                   |              |                 |                 |                  |

|       |                                  |                                  |                     |                   |                   |                 |               |                 |               |         |                 |               |
|-------|----------------------------------|----------------------------------|---------------------|-------------------|-------------------|-----------------|---------------|-----------------|---------------|---------|-----------------|---------------|
| 15    | 0,4                              | 12 <sup>■</sup> kDa              | 532,8               | 2+                | SKNDYYFK          | 234             | P08935        | BA00172         | Cystatin      |         |                 |               |
|       |                                  |                                  | 567,8               | 2+                | NDYYFKER          |                 |               |                 |               |         |                 |               |
|       |                                  |                                  | 425,2               | 2+                | NDYYFK            |                 |               |                 |               |         |                 |               |
|       |                                  |                                  | 743,4               | 2+                | RVVEAQSQVVSGVK    |                 |               |                 |               |         |                 |               |
|       |                                  |                                  | 665,4               | 2+                | VVEAQSQVVSGVK     |                 |               |                 |               |         |                 |               |
|       |                                  |                                  | 902,9               | 2+                | DVTDPDVQEAAFAVEK  |                 |               |                 |               |         |                 |               |
| 16    | 3,5                              | 60 <sup>■</sup> kDa              | 607,8               | 2+                | VFDYTDWIR         | CBM40647        | BA00091       | Serine protease |               |         |                 |               |
|       |                                  |                                  | 807,4               | 2+                | STYWYELLPAQSR     |                 |               |                 |               |         |                 |               |
|       | 3,5                              | 28 <sup>■</sup> kDa              | 987,5               | 2+                | DGHLISIDSQEEADFAK | Q6T7B6          | BA00002       | C-type lectin   |               |         |                 |               |
|       |                                  |                                  | 459,3               | 2+                | LVSENVEK          |                 |               |                 |               |         |                 |               |
|       |                                  |                                  | 576,3               | 2+                | GVDVFWIGMK        |                 |               |                 |               |         |                 |               |
|       |                                  |                                  | 582,3               | 2+                | SEILWMGLSK        |                 |               |                 |               |         |                 |               |
|       | 17                               | 2                                | 60 <sup>■</sup> kDa | 459,3             | 2+                | LVSENVEK        | Q6T7B6        | BA00002         | C-type lectin |         |                 |               |
|       |                                  |                                  |                     | 576,3             | 2+                | GVDVFWIGMK      |               |                 |               |         |                 |               |
|       |                                  |                                  |                     | 454,2             | 2+                | KEADFAK         |               |                 |               | Q6X5T5  | BA00006         | C-type lectin |
|       |                                  |                                  |                     | 607,8             | 2+                | VFDYTDWIR       |               |                 |               |         |                 |               |
| 807,4 |                                  |                                  |                     | 2+                | STYWYELLPAQSR     | CBM40647        |               |                 |               | BA00091 | Serine protease |               |
| 494,7 |                                  |                                  |                     | 2+                | ATYWYER           |                 |               |                 |               |         |                 |               |
| 607,8 |                                  | 2+                               | VFDYTDWIR           | CBM40647          | BA00034           | Serine protease |               |                 |               |         |                 |               |
| 1,1   |                                  | 31 <sup>■</sup> kDa              | 454,2               |                   |                   |                 | 2+            | KEADFAK         | Q6X5T5        | BA00006 | C-type lectin   |               |
|       |                                  |                                  | 511,3               |                   |                   |                 | 2+            | AAHQKLPEK       |               |         |                 |               |
|       |                                  |                                  | 797,4               |                   |                   |                 | 2+            | TLCAGILEGGIDSK  |               |         |                 | 92            |
| 3,2   | 16 <sup>■</sup> /31 <sup>■</sup> | 987,5                            | 2+                  | DGHLISIDSQEEADFAK | Q6T7B6            | BA00002         | C-type lectin |                 |               |         |                 |               |
|       |                                  | 459,3                            | 2+                  | LVSENVEK          |                   |                 |               |                 |               |         |                 |               |
| 18    | 2,6                              | 60 <sup>▼</sup> /40 <sup>▼</sup> | 571,8               | 2+                | VFDYGDWIK         | CBM40646        | BA00031       | Serine protease |               |         |                 |               |
|       |                                  |                                  | 552,8               | 2+                | TLCAGVLEGGK       |                 |               |                 | de novo       | BA00127 | Serine protease |               |

|    |     |                                   |       |    |                     |         |          |         |                 |
|----|-----|-----------------------------------|-------|----|---------------------|---------|----------|---------|-----------------|
|    |     |                                   | 757,3 | 2+ | VIGGDECDINEHR       | 110     | Q9PRY9   |         | Serine protease |
|    |     |                                   | 505,3 | 3+ | VIGGDECDINEHR       |         |          |         |                 |
|    | 0,5 | 33 <sup>▼</sup> kDa               | 785,4 | 2+ | NVQNEDEEIRVPK       | 211     | Q6T6S7   | BA00263 | Serine protease |
|    |     |                                   | 530,3 | 2+ | LFDYSVCR            | de novo |          |         |                 |
|    |     |                                   | 1044, | 2+ | FHCAGTLLNKEWVLTAAAR |         |          |         |                 |
|    |     |                                   | 530,3 | 2+ | LFDYSVCR            |         |          |         |                 |
|    |     |                                   | 797,4 | 2+ | TLCAGILEGGIDSK      |         |          |         |                 |
|    | 0,5 | 25 <sup>▼</sup> kDa               | 511,3 | 2+ | AAHQKLPEK           | 108     | Q6T6S7   | BA00263 | Serine protease |
|    |     |                                   | 595,3 | 2+ | WDKDILIR            |         |          |         |                 |
|    |     |                                   | 597,8 | 2+ | IMGWGSITTTK         |         |          |         |                 |
|    |     |                                   | 530,3 | 2+ | LFDYSVCR            |         |          |         |                 |
| 19 | 0,2 | 100 <sup>■</sup> kDa              | 571,8 | 2+ | VFDYGDWIK           |         | CBM40646 | BA00031 | Serine protease |
|    |     |                                   | 534,3 | 2+ | IKPNPDQQK           |         |          |         |                 |
|    | 0,4 | 100 <sup>■</sup> /50 <sup>■</sup> | 490,3 | 3+ | VIGGAECNINEHR       |         | CBM40647 | BA00152 | Serine Protease |
|    |     |                                   | 734,9 | 2+ | VIGGAECNINEHR       |         |          |         |                 |
|    | 1,5 | 100 <sup>■</sup> /50 <sup>■</sup> | 607,8 | 2+ | VFDYTDWIR           |         | CBM40647 | BA00091 | Serine protease |
|    |     |                                   | 807,4 | 2+ | STYWYELLPAQSR       |         |          |         |                 |
|    |     |                                   | 552,8 | 2+ | TLCAGVLEGGK         | 60      | P86497   | BA00152 | Serine Protease |
|    | 0,1 | 28 <sup>■</sup> kDa               | 807,4 | 2+ | STYWYELLPAQSR       |         | CBM40647 | BA00091 | Serine protease |
|    |     |                                   | 466,7 | 2+ | YFCLSSR             |         |          |         |                 |
|    | 0,8 | 12 <sup>■</sup> kDa               | 602,3 | 3+ | DVTDPDVQEAFAVEK     | 201     | P08935   | BA00172 | Cystatin        |
|    |     |                                   | 902,9 | 2+ | DVTDPDVQEAFAVEK     |         |          |         |                 |
|    |     |                                   | 567,8 | 2+ | NDYYFKER            |         |          |         |                 |
|    |     |                                   | 665,4 | 2+ | VVEAQSQVVSGVK       |         |          |         |                 |
|    |     |                                   | 532,8 | 2+ | SKNDYYFK            |         |          |         |                 |

|    |     |                                   |       |    |                    |    |          |             |                 |
|----|-----|-----------------------------------|-------|----|--------------------|----|----------|-------------|-----------------|
|    |     |                                   | 775,4 | 2+ | YNAHSKNDYYFK       |    |          |             |                 |
| 20 | 1,6 | 100 <sup>■</sup> kDa              | 571,8 | 2+ | VFDYGDWIK          |    | CBM40646 | BA00031     | Serine protease |
|    |     |                                   | 534,3 | 2+ | IKPNPDQQK          |    |          |             |                 |
|    |     |                                   | 734,9 | 2+ | VIGGAECNINEHR      |    | CBM40647 | BA00152     | Serine Protease |
|    |     |                                   | 748,4 | 2+ | DIMoxLIK           |    |          |             |                 |
|    | 6,2 | 100 <sup>■</sup> /45 <sup>■</sup> | 552,8 | 2+ | TLCAGVLEGGK        | 69 | P86497   | BA00031/152 | Serine Protease |
|    | 3   | 45 <sup>■</sup> kDa               | 607,8 | 2+ | VFDYTDWIR          |    |          | BA00034/91  |                 |
|    |     |                                   | 431,8 | 2+ | AFDEPKR            |    | Q6T7B6   | BA00473     | C-type lectin   |
|    |     |                                   | 630,8 | 2+ | CGDDYPFVCK         |    |          |             |                 |
|    | 1,6 | 36 <sup>■</sup> kDa               | 534,3 | 2+ | IKPNPDQQK          |    | CBM40646 | BA00031     | Serine protease |
|    |     |                                   | 612,3 | 2+ | IKPNPDQQKR         |    |          |             |                 |
|    |     |                                   | 504,3 | 2+ | DAYGDLPEK          |    |          |             |                 |
|    |     |                                   | 625,8 | 2+ | DAYGDLPEKSR        |    |          |             |                 |
|    |     |                                   | 571,8 | 2+ | VFDYGDWIK          |    |          |             |                 |
| 21 | 1,2 | 40 <sup>■</sup> kDa               | 807,4 | 2+ | STYWYELLPAQSR      |    | CBM40647 | BA00091     | Serine protease |
|    |     |                                   | 578,8 | 2+ | VFDYADWIK          |    | CBM40648 | BA00152     | Serine protease |
|    |     |                                   | 734,9 | 2+ | VIGGAECNINEHR      |    |          |             |                 |
|    |     |                                   | 552,8 | 2+ | TLCAGVLEGGK        | 76 | P86497   |             | Serine Protease |
|    | 0,3 | 28 <sup>■</sup> kDa               | 454,3 | 2+ | KEADFVAK           |    | Q6X5T5   | BA00006     | C-type lectin   |
|    |     |                                   | 742,8 | 2+ | EADYEEFLEIAR       |    | G8XQX1   | BA00017     | LAO             |
|    |     |                                   | 502,3 | 2+ | VTVLEASER          | 57 | P0DI84   | BA00017     | LAO             |
|    |     |                                   | 987,4 | 2+ | DGHLISIDSQEEADFVAK |    | Q6T7B6   | BA00002     | C-type lectin   |
|    |     |                                   | 459,3 | 2+ | LVSENVEK           |    |          |             |                 |
|    |     |                                   | 728,3 | 2+ | DEGCLPDWSSYK       | 47 | Q7LZK8   | BA00012     | C-type lectin   |
|    | 0,7 | 12 <sup>■</sup> kDa               | 454,7 | 2+ | EESAFVAR           |    | I7ICN3   | BA00113     | C-type lectin   |
|    |     |                                   | 525,8 | 2+ | VAPDTCFLK          |    | AAX86634 | BA00027     | PIII-SVMP       |

|    |     |                                   |                                                                               |                                                    |                                                                                                                                                      |         |                              |                        |                                                     |
|----|-----|-----------------------------------|-------------------------------------------------------------------------------|----------------------------------------------------|------------------------------------------------------------------------------------------------------------------------------------------------------|---------|------------------------------|------------------------|-----------------------------------------------------|
| 22 | 3,5 | 31 <sup>▼</sup> /14 <sup>▼</sup>  | 431,7                                                                         | 2+                                                 | AFDEPKR                                                                                                                                              | de novo | Q6T7B6                       | BA00473                | C-type lectin                                       |
|    | 1,1 | 18 <sup>▼</sup> kDa               | 431,7<br>839,4<br>860,9<br>401,7                                              | 2+<br>2+<br>2+<br>2+                               | AFDEPKR<br>EEADFVAQLVSENVK<br>SSPDYVWIGLWNQR<br>TWLNLR                                                                                               |         | Q6T7B6                       | BA00473                | C-type lectin                                       |
|    | 1,5 | 14 <sup>▼</sup> kDa               | 742,8<br>502,3<br>475,7<br>502,3<br>431,7<br>434,2                            | 2+<br>2+<br>2+<br>2+<br>2+<br>2+                   | EADYEEFLEIAR<br>VTVLEASER<br>EEGEFIVK<br>VTVLEASER<br>AFDEPKR<br>NCFGLEK                                                                             |         | G8XQX1<br>Q6X5T4             | BA00017<br>BA00465     | LAO<br>C-type lectin                                |
| 23 | 0,7 | 33 <sup>■</sup> kDa               | 742,8<br>502,3<br>1008,<br>849,9<br>538,3<br>422,8<br>747,3<br>498,3<br>1073, | 2+<br>2+<br>2+<br>2+<br>2+<br>2+<br>2+<br>3+<br>2+ | EADYEEFLEIAR<br>VTVLEASER<br>LNEFVQETENGWYFIK<br>DPGLLKYPVKPSEAGK<br>YPVKPSEAGK<br>AVEELKR<br>ADDKNPLEECFR<br>ADDKNPLEECFR<br>RFDEIVGGMoxDQLPTSMoxYR | 221     | G8XQX1<br>Q4F867             | BA00017<br>BA00017     | LAO<br>LAO                                          |
| 24 | 0,7 | 150 <sup>■</sup> /31 <sup>■</sup> | 742,8                                                                         | 2+                                                 | EADYEEFLEIAR                                                                                                                                         |         | G8XQX1                       | BA00017                | LAO                                                 |
|    | 0,2 | 150 <sup>■</sup> kDa              | 502,3                                                                         | 2+                                                 | VTVLEASER                                                                                                                                            |         | G8XQX1                       | BA00017                | LAO                                                 |
|    | 0,2 | 55 <sup>■</sup> kDa               | 463,8<br>517,3<br>552,8                                                       | 2+<br>2+<br>2+                                     | FVFDLASK<br>IYIWIGLR<br>TLCAGVLEGGK                                                                                                                  | 52      | Q6X5T4<br>AAR06853<br>P86497 | BA00475<br>BA00031/152 | C-type lectin<br>C-type lectin 3<br>Serine Protease |

|       |     |                     |       |    |                    |     |          |          |                               |                 |
|-------|-----|---------------------|-------|----|--------------------|-----|----------|----------|-------------------------------|-----------------|
|       | 0,5 | 31 <sup>■</sup> kDa | 576,3 | 2+ | VTVTYNTPEK         | 49  | G8XQX1   | BA00070  | LAO                           |                 |
|       |     |                     | 425,2 | 2+ | FDYNAYTR           |     | Q6X5T4   | BA00475  | C-type lectin                 |                 |
|       |     |                     | 1046, | 2+ | FCMEQANDGHLVSIQSIK |     | Q6X5T3   | BA00287  | C-type lectin 5               |                 |
|       |     |                     | 469,3 | 2+ | VTYVNWR            |     | 116      | AAR06853 |                               | C-type lectin 3 |
|       |     |                     | 475,3 | 2+ | VIYVNWR            |     |          |          |                               |                 |
|       |     |                     | 691,3 | 2+ | EGESQMCQALTK       |     |          |          |                               |                 |
|       |     |                     | 699,3 | 2+ | EGESQMoxCQALTK     |     |          |          |                               |                 |
|       |     |                     | 517,3 | 2+ | IYIWIGLR           |     |          |          |                               |                 |
|       |     |                     | 652,9 | 2+ | IYIWIGLRDR         |     |          |          |                               |                 |
| 24,25 | 0,3 | 28 <sup>■</sup> kDa | 438,7 | 2+ | STDDLPSR           | 52  | G8XQX1   | BA00070  | LAO                           |                 |
|       |     |                     | 459,3 | 2+ | LVSENVK            |     | Q6T7B6   | BA00002  | C-type lectin                 |                 |
|       |     |                     | 764,9 | 2+ | ELVNGGHLMoxSVNSR   |     | Q7LZK8   | BA00012  | C-type lectin                 |                 |
| 25    | 1   | 28 <sup>■</sup> kDa | 582,3 | 2+ | SEILWMGLSK         | 101 | Q6X5T5   | BA00006  | C-type lectin                 |                 |
|       |     |                     | 469,7 | 2+ | EEADFVTK           |     | Q6X5T3   | BA00301  | C-type lectin                 |                 |
|       |     |                     | 620,3 | 2+ | FVYDAWIGLR         |     | Q7LZK5   | BA00301  | C-type lectin (Bitiscetin α)  |                 |
|       |     |                     | 712,8 | 2+ | DPGCLPDWSSYK       |     |          |          |                               |                 |
|       |     |                     | 469,7 | 2+ | EEADFVTK           |     |          |          |                               |                 |
|       |     |                     | 620,3 | 2+ | FVYDAWIGLR         |     |          |          |                               |                 |
|       |     |                     | 849,9 | 2+ | FVYDAWIGLRDESK     |     |          |          |                               |                 |
|       |     |                     | 603,8 | 2+ | TWTDLPCGEK         |     |          |          |                               |                 |
|       |     |                     | 983,5 | 2+ | TWTDLPCGEKNPFICK   |     |          |          |                               |                 |
| 26    | 0,9 | 50 <sup>■</sup> kDa | 713,3 | 2+ | EISEYGMVDPGTK      |     | AAX86634 | BA00027  | PIII-SVMP                     |                 |
|       | 0,5 | 28 <sup>■</sup> kDa | 517,7 | 2+ | VGTWEDA EK         |     | Q6X5T3   | BA00301  | C-type lectin                 |                 |
|       |     |                     | 469,7 | 2+ | EEADFVTK           |     |          |          |                               |                 |
|       |     |                     | 431,3 | 2+ | LASQTLTK           |     |          |          |                               |                 |
|       |     |                     | 620,3 | 2+ | FVYDAWIGLR         |     |          |          |                               |                 |
|       |     |                     | 813,9 | 2+ | IVLVWIGLSHFWR      | 103 | Q7LZK8   | BA00012  | C-type lectin (Bitiscetin □□) |                 |

|          |     |                     |       |    |                              |        |         |                 |               |
|----------|-----|---------------------|-------|----|------------------------------|--------|---------|-----------------|---------------|
|          |     |                     | 985,5 | 2+ | ALSDEPICFVAESFHNK            |        |         |                 |               |
| 27       | 1,4 | 50 <sup>■</sup> kDa | 765,4 | 2+ | IIALGHSGFSEDQR               | F8S0Z7 | BA00083 | 5'-Nucleotidase |               |
|          |     |                     | 979,1 | 2+ | YLGYNVVFDDKGNVIK             |        |         |                 |               |
|          |     |                     | 513,8 | 2+ | ASGNPILLNK                   |        |         |                 |               |
|          |     |                     | 529,8 | 2+ | DIPEDQDVK                    |        |         |                 |               |
|          |     |                     | 555,8 | 2+ | QAFEHSVHR                    |        |         |                 |               |
|          |     |                     | 628,9 | 2+ | GRGELLQVSGIK                 |        |         |                 |               |
|          |     |                     | 522,3 | 2+ | GELLQVSGIK                   |        |         |                 |               |
|          |     |                     | 779,1 | 3+ | GDSSNHSSGDLDISIVGDYIKR       |        |         |                 |               |
|          |     |                     | 437,7 | 2+ | VFPAVEGR                     |        |         |                 |               |
|          |     |                     | 982,5 | 2+ | ALSDEPICFVAESFHNK            | 56     | Q7LZK8  | BA00012         | C-type lectin |
|          | 0,4 | 33 <sup>■</sup> kDa | 742,9 | 2+ | EADYEEFLEIAR                 | G8XQX1 | BA00017 | LAO             |               |
|          |     |                     | 931,5 | 3+ | TSNPQHVVIVGAGMSGLSAAYVLAGAGH |        |         |                 |               |
|          |     |                     | 502,3 | 2+ | VTVLEASER                    |        |         |                 |               |
|          |     |                     | 538,3 | 2+ | YPVKPSEAGK                   |        |         |                 |               |
|          |     |                     | 611,8 | 2+ | SAGQLYQASLGK                 |        |         |                 |               |
|          |     |                     | 422,8 | 2+ | AVEELKR                      |        |         |                 |               |
|          |     |                     | 469,7 | 2+ | EEADFVTK                     | 30     | Q6X5T3  | BA00301         | C-type lectin |
|          |     |                     | 431,3 | 2+ | LASQTLTK                     |        |         |                 |               |
|          |     |                     | 983,5 | 2+ | TWTDLPCGEKNPFICK             |        |         |                 |               |
|          | 0,4 | 30 <sup>■</sup> kDa | 502,3 | 2+ | VTVLEASER                    | G8XQX1 | BA00017 | LAO             |               |
|          |     |                     | 576,3 | 2+ | VTVTYNTPEK                   | G8XQX1 | BA00070 | LAO             |               |
|          |     |                     | 431,3 | 2+ | LASQTLTK                     |        | BA00298 |                 |               |
|          |     |                     | 502,3 | 2+ | VTVLEASER                    | 49     | P0DI84  | BA00070         | LAO           |
|          |     |                     | 438,7 | 2+ | STTDLPSR                     |        |         |                 |               |
|          |     |                     | 575,4 | 2+ | INFKPPLPPK                   | 48     | B5U6Y8  |                 | LAO           |
|          |     |                     | 422,8 | 2+ | AVEELKR                      | 48     | B5U6Y8  | BA00017/70      | LAO           |
| 27,28,29 | 3,5 | 25 <sup>■</sup> kDa | 431,3 | 2+ | LASQTLTK                     | Q6X5T3 | BA00301 | C-type lectin   |               |



|       |     |                      |       |    |                          |     |        |         |                 |
|-------|-----|----------------------|-------|----|--------------------------|-----|--------|---------|-----------------|
|       |     |                      | 849,9 | 2+ | FVYDAWIGLRDESK           |     |        |         |                 |
|       |     |                      | 832,4 | 2+ | FCVENSGHLASIDSK          | 236 | Q7LZK5 | BA00301 | C-type lectin   |
|       |     |                      | 469,7 | 2+ | EEADFVTK                 |     |        |         |                 |
|       |     |                      | 861,7 | 3+ | FCVENSGHLASIDSKEEADFVTK  |     |        |         |                 |
|       |     |                      | 431,3 | 2+ | LASQTLTK                 |     |        |         |                 |
|       |     |                      | 849,9 | 2+ | FVYDAWIGLRDESK           |     |        |         |                 |
|       |     |                      | 698,8 | 2+ | CFGLDVHTEYR              |     |        |         |                 |
|       |     |                      | 603,8 | 2+ | TWTDLPCGEK               |     |        |         |                 |
| 28    | 0,5 | 150 <sup>■</sup> kDa | ND    |    |                          |     |        |         |                 |
|       | 0,6 | 55 <sup>■</sup> kDa  | 513,8 | 2+ | ASGNPILLNK               |     | F8S0Z7 | BA00083 | 5'-Nucleotidase |
|       |     |                      | 792,4 | 2+ | IQLQNYYSQEIGK            |     |        |         |                 |
|       |     |                      | 628,9 | 2+ | GRGELLQVSGIK             |     |        |         |                 |
|       |     |                      | 522,3 | 2+ | GELLQVSGIK               |     |        |         |                 |
|       |     |                      | 765,4 | 2+ | IIALGHSGFSEDQR           | 143 | F8S0Z7 | BA00083 | 5'-Nucleotidase |
|       |     |                      | 653,9 | 2+ | QVPVVQAYAFGK             |     |        |         |                 |
|       |     |                      | 555,8 | 2+ | QAFEHSVHR                |     |        |         |                 |
|       |     |                      | 437,7 | 2+ | VFPAVEGR                 |     |        |         |                 |
|       |     |                      | 764,9 | 2+ | ELVNGGHLMoxSVNSR         | 91  | Q7LZK8 | BA00012 | C-type lectin   |
|       |     |                      | 728,8 | 2+ | DEGCLPDWSSYK             |     |        |         |                 |
| 28,29 | 6,8 | 25 <sup>■</sup> kDa  | 517,7 | 2+ | VGTWEDA EK               |     | Q6X5T3 | BA00301 | C-type lectin   |
|       |     |                      | 469,7 | 2+ | EEADFVTK                 |     |        |         |                 |
|       |     |                      | 620,3 | 2+ | FVYDAWIGLR               |     |        |         |                 |
|       |     |                      | 712,8 | 2+ | DPGCLPDWSSYK             | 214 | Q7LZK5 | BA00301 | C-type lectin   |
|       |     |                      | 517,7 | 2+ | VGTWEDA EK               |     |        |         |                 |
|       |     |                      | 620,3 | 2+ | FVYDAWIGLR               |     |        |         |                 |
|       |     |                      | 919,1 | 3+ | TQQCSPQWTDGSSVVYENVDEPTK |     |        |         |                 |
|       |     |                      | 983,5 | 2+ | TWTDLPCGEKNPFICK         |     |        |         |                 |
|       |     |                      | 764,9 | 2+ | ELVNGGHLMoxSVNSR         | 195 | Q7LZK8 | BA00012 | C-type lectin   |
|       |     |                      | 410,7 | 2+ | TWADA EK                 |     |        |         |                 |

|       |     |                      |       |    |                   |          |            |               |               |
|-------|-----|----------------------|-------|----|-------------------|----------|------------|---------------|---------------|
|       |     |                      | 628,3 | 2+ | TWADAEKFCK        |          |            |               |               |
|       |     |                      | 728,8 | 2+ | DEGCLPDWSSYK      |          |            |               |               |
|       |     |                      | 701,3 | 2+ | DEGCLPDWSSYKGHCYK |          |            |               |               |
| 29    | 1,8 | 66 <sup>■</sup> kDa  | 595,3 | 2+ | VVNNVNVIIYR       | ADI47619 | BA00462    | PIII-SVMP     |               |
|       |     |                      | 492,7 | 2+ | CCNAATCK          | ADI47619 | BA00042    | PIII-SVMP     |               |
|       |     |                      | 1052, | 2+ | LTPGSQCNYGECCDQCR |          |            |               |               |
|       | 1,3 | 25 <sup>■</sup> kDa  | 581,8 | 2+ | KVGTWEDA EK       | 250      | Q7LZK5     | BA00301       | C-type lectin |
|       |     |                      | 582,3 | 2+ | WIQWTCNR          | 195      | Q7LZK8     | BA00012       | C-type lectin |
| 30    | 0,1 | 100 <sup>■</sup> kDa | 742,8 | 2+ | EADYEEFLEIAR      | G8XQX1   | BA00017    | LAO           |               |
|       |     |                      | 502,3 | 2+ | VTVLEASER         |          |            |               |               |
|       |     |                      | 611,8 | 2+ | SAGQLYQASLGK      |          |            |               |               |
|       |     |                      | 645,4 | 2+ | YINVIVVADQR       | ADI47619 | BA00042    | PIII-SVMP     |               |
|       |     |                      | 611,8 | 2+ | SAGQLYQASLGK      | G8XQX1   | BA00070    | LAO           |               |
|       |     |                      | 576,3 | 2+ | VTVTYNTPEK        |          |            |               |               |
|       |     |                      | 595,3 | 2+ | VVNNVNVIIYR       | ADI47619 | BA00462    | PIII-SVMP     |               |
|       |     |                      | 431,7 | 2+ | AFDEPKR           | Q6T7B6   | BA00473    | C-type lectin |               |
|       |     |                      | 860,9 | 2+ | SSPDYVWIGLWNQR    |          |            |               |               |
|       |     |                      | 742,9 | 2+ | EADYEEFLEIAR      | G8XQX1   | BA00017    | LAO           |               |
|       | 1,1 | 66 <sup>■</sup> kDa  | 1052, | 2+ | LTPGSQCNYGECCDQCR | ADI47619 | BA00042    | PIII-SVMP     |               |
| 30,31 | 0,9 | 50 <sup>■</sup> kDa  | 538,3 | 2+ | YPVKPSEAGK        | G8XQX1   | BA00017/70 | LAO           |               |
|       |     |                      | 611,8 | 2+ | SAGQLYQASLGK      |          |            |               |               |
|       |     |                      | 422,8 | 2+ | AVEELKR           |          |            |               |               |
|       |     |                      | 502,3 | 2+ | VTVLEASER         | G8XQX1   | BA00017    | LAO           |               |
|       |     |                      | 438,7 | 2+ | STTDLPSR          | G8XQX1   | BA00070    | LAO           |               |
| 30    | 0,7 | 50 <sup>■</sup> kDa  | 422,8 | 2+ | AVEELKR           |          |            |               |               |
|       |     |                      | 438,7 | 2+ | STTDLPSR          |          |            |               |               |

|     |                     |                      |       |    |                   |     |          |            |               |
|-----|---------------------|----------------------|-------|----|-------------------|-----|----------|------------|---------------|
|     |                     |                      | 535,3 | 2+ | YPVKPSEAGK        |     |          |            |               |
|     |                     |                      | 575,4 | 2+ | IIFKPPLPPK        |     |          |            |               |
|     |                     |                      | 728,3 | 2+ | DEGCLPDWSSYK      | 60  | Q7LZK8   | BA00062    | C-type lectin |
| 0,4 | 28 <sup>■</sup> kDa |                      | 459,3 | 2+ | LVSENVEK          |     | Q6T7B6   | BA00002    | C-type lectin |
|     |                     |                      | 683,9 | 2+ | SKGVDVFWIGMK      |     |          |            |               |
|     |                     |                      | 576,3 | 2+ | GVDVFWIGMK        |     |          |            |               |
|     |                     |                      | 517,7 | 2+ | VGTWEDA EK        |     | Q6X5T3   | BA00301    | C-type lectin |
|     |                     |                      | 469,7 | 2+ | EEADFVTK          |     |          |            |               |
|     |                     |                      | 431,3 | 2+ | LASQTLTK          |     |          |            |               |
|     |                     |                      | 620,3 | 2+ | FVYDAWIGLR        |     |          |            |               |
|     |                     |                      | 849,9 | 2+ | FVYDAWIGLRDESK    |     |          |            |               |
|     |                     |                      | 756,9 | 2+ | ELVNGGHLMSVNSR    | 132 | Q7LZK8   | BA00012    | C-type lectin |
|     |                     |                      | 764,9 | 2+ | ELVNGGHLMOxSVNSR  |     |          |            |               |
|     |                     |                      | 701,3 | 3+ | DEGCLPDWSSYKGHCYK |     |          |            |               |
|     |                     |                      | 728,8 | 2+ | DEGCLPDWSSYK      |     |          |            |               |
|     |                     |                      | 431,6 | 2+ | LASQTLTK          | 92  | Q7LZK5   | BA00301    | C-type lectin |
|     |                     |                      | 469,7 | 2+ | EEADFVTK          |     |          |            |               |
|     |                     |                      | 517,7 | 2+ | VGTWEDA EK        |     |          |            |               |
|     |                     |                      | 620,3 | 2+ | FVYDAWIGLR        |     |          |            |               |
|     |                     |                      | 849,9 | 2+ | FVYDAWIGLRDESK    |     |          |            |               |
|     |                     |                      | 983,5 | 2+ | TWTDLPCGEKNPFICK  |     |          |            |               |
| 31  | 0,2                 | 100 <sup>■</sup> kDa | 645,4 | 2+ | YINVIVVADQR       |     | ADI47619 | BA00042    | PIII-SVMP     |
|     |                     |                      | 576,3 | 2+ | VTVTYNTPEK        |     | AAZ08620 | BA00070    | LAO           |
|     |                     |                      | 438,7 | 2+ | STTDLPSR          |     |          |            |               |
|     |                     |                      | 860,9 | 2+ | SSPDYVWIGLWNQR    |     | Q6T7B6   | BA00473    | C-type lectin |
|     |                     |                      | 422,8 | 2+ | AVEELKR           | 47  | G8XQX1   | BA00017/70 | LAO           |
|     | 0,2                 | 50 <sup>■</sup> kDa  | 742,9 | 2+ | EADYEEFLEIAR      |     | G8XQX1   | BA00017    | LAO           |
|     |                     |                      | 576,3 | 2+ | VTVTYNTPEK        |     | AAZ08620 | BA00070    | LAO           |
|     |                     |                      | 575,3 | 2+ | IIFKPPLPPK        |     |          |            |               |

|    |     |                     |       |    |                   |    |          |            |                  |
|----|-----|---------------------|-------|----|-------------------|----|----------|------------|------------------|
|    |     |                     | 1008, | 2+ | LNEFVQETENGWYFIK  | 97 | Q4F867   | BA00017    | LAO              |
|    |     |                     | 538,3 | 2+ | YPVKPSEAGK        |    |          |            |                  |
|    |     |                     | 422,7 | 2+ | AVEELKR           |    |          |            |                  |
|    |     |                     | 441,7 | 2+ | IFLTCTK           |    | AAZ08620 | BA00070    | LAO              |
|    |     |                     | 438,7 | 2+ | STTDLPSR          |    |          |            |                  |
|    |     |                     | 747,3 | 2+ | ADDKNPLEEFCFR     |    | G8XQX1   | BA00017/70 | LAO              |
|    | 0,2 | 28 <sup>■</sup> kDa | 576,3 | 2+ | GVDVFWIGMK        |    | Q6T7B6   | BA00002    | C-type lectin    |
|    |     |                     | 469,3 | 2+ | VTYVNWR           |    | Q6X5T3   | BA00287    | C-type lectin    |
|    |     |                     | 463,8 | 2+ | FVFDLASK          |    | Q6X5T4   | BA00475    | C-type lectin    |
|    |     |                     | 525,2 | 2+ | FDYNAYTR          |    |          |            |                  |
|    |     |                     | 728,8 | 2+ | DEGCLPDWSSYK      | 44 | Q7LZK8   | BA00012    | C-type lectin    |
|    |     |                     | 620,3 | 2+ | FVYDAWIGLR        | 40 | Q7LZK5   | BA00301    | C-type lectin    |
|    |     |                     | 849,9 | 2+ | FVYDAWIGLRDESK    |    |          |            |                  |
| 32 | 0,1 | 55 <sup>▼</sup> kDa | 611,8 | 2+ | SAGQLYQASLGK      |    | G8XQX1   | BA00017    | LAO              |
|    | 0,1 | 45 <sup>▼</sup> kDa | 514,3 | 2+ | IPCAPQDVK         | 39 | Q4VM08   | BA00101    | PIII-SVMP        |
|    |     |                     | 718,3 | 2+ | LYCFDNLPEHK       |    |          |            |                  |
|    | 0,3 | 24 <sup>▼</sup> kDa | 639,7 | 3+ | SSDPIKYINVIVVADQR |    | ADI47619 | BA00042    | PIII-SVMP        |
|    |     |                     | 645,4 | 2+ | YINVIVVADQR       |    |          |            |                  |
|    |     |                     | 664,4 | 2+ | LVTYYKGELNK       |    |          |            |                  |
|    |     |                     | 753,8 | 2+ | SASDTLHSFAEWR     |    |          |            |                  |
|    |     |                     | 444,7 | 2+ | ERDLLSR           |    |          |            |                  |
|    | 0,8 | 18 <sup>▼</sup> kDa | 463,8 | 2+ | FVFDLASK          |    | Q6X5T4   | BA00475    | C-type lectin    |
|    |     |                     | 525,2 | 2+ | FDYNAYTR          |    |          |            |                  |
|    | 0,8 | 10 <sup>▼</sup> kDa | 469,3 | 2+ | VTYVNWR           | 28 | Q6X5T3   | BA00287    | C-type lectin    |
| 33 | 0,9 | 95 <sup>■</sup> kDa | 1177, | 1+ | VNADHVGIFYR       |    | CBJ34330 | BA00089    | Aminopeptidase A |
|    |     |                     | 1266, | 1+ | AGFIDDAFALAR      |    |          |            |                  |

|    |     |                                  |       |    |                              |          |          |           |           |
|----|-----|----------------------------------|-------|----|------------------------------|----------|----------|-----------|-----------|
|    |     |                                  | 501,3 | 1+ | AGLLK                        |          |          |           |           |
|    |     |                                  | 1709, | 1+ | YLNQNEAEYIPWQR               |          |          |           |           |
|    |     |                                  | 1005, | 1+ | AIVAIYIR                     |          |          |           |           |
|    |     |                                  | 1067, | 1+ | QCISLFGSR                    | AGL45259 | BA00101  | PIII-SVMP |           |
|    |     |                                  | 1527, | 1+ | ATVAQDACFQFNR                |          |          |           |           |
|    |     |                                  | 1131, | 1+ | LANDYGYCR                    |          |          |           |           |
|    |     |                                  | 1259, | 1+ | LANDYGYCRK                   |          |          |           |           |
|    |     |                                  | 1435, | 1+ | LYCFDNLPEHK                  |          |          |           |           |
|    |     |                                  | 651,4 | 1+ | YLIDK                        | Q4VM07   | BA00377  | PIII-SVMP |           |
|    |     |                                  | 2893, | 1+ | TDIVSPPVCGNFLVELGEDCDCGSPR   |          |          |           |           |
|    |     |                                  | 1629, | 1+ | DCQNQCCNAATCK                |          |          |           |           |
|    |     |                                  | 764,6 | 1+ | TAGTVCR                      |          |          |           |           |
|    |     |                                  | 1694, | 1+ | LSCEASYLFSDCSR               |          |          |           |           |
|    |     |                                  | 1326, | 1+ | MPQCLLNPLK                   |          |          |           |           |
|    | 5,3 | 31 <sup>■</sup> /20 <sup>■</sup> | 959,1 | 2+ | SSDPIKYINVIVVADQR            | ADI47619 | BA00042  | PIII-SVMP |           |
|    |     |                                  | 753,9 | 2+ | SASDTLHSFAEWR                |          |          |           |           |
|    | 3,8 | 20 <sup>■</sup> kDa              | 639,7 | 3+ | SSDPIKYINVIVVADQR            | ADI47619 | BA00042  | PIII-SVMP |           |
|    |     |                                  | 645,4 | 2+ | YINVIVVADQR                  |          |          |           |           |
|    |     |                                  | 664,4 | 2+ | LVTYYKGELNK                  |          |          |           |           |
|    |     |                                  | 502,3 | 2+ | GELNKITTK                    |          |          |           |           |
|    |     |                                  | 857,9 | 2+ | VHQYFNTLNEMYR                |          |          |           |           |
|    |     |                                  | 414,2 | 2+ | YFYIRPILR                    |          |          |           |           |
|    |     |                                  | 796,9 | 2+ | SAAVVMNYQPEIDR               |          |          |           |           |
|    |     |                                  | 1122, | 3+ | SAAVVMNYQPEIDRAVAAIMAHMGNLHG |          |          |           |           |
|    |     |                                  | 597,6 | 3+ | AVAAIMAHMGNLHGIR             |          |          |           |           |
|    |     |                                  | 895,9 | 2+ | AVAAIMAHMGNLHGIR             |          |          |           |           |
| 34 | 0,5 | 95 <sup>▼</sup> kDa              | 764,3 | 2+ | ATVAQDACFQFNR                | de novo  | AGL45259 | BA00101   | PIII-SVMP |
|    | 0,3 | 45 <sup>▼</sup> kDa              | 718,3 | 2+ | LYCFDNLPEHK                  |          |          |           |           |

|       |     |                                  |       |    |              |          |         |           |
|-------|-----|----------------------------------|-------|----|--------------|----------|---------|-----------|
|       |     |                                  | 534,3 | 2+ | QCISLFGSR    |          |         |           |
|       | 0,3 | 20 <sup>▼</sup> kDa              | ND    |    |              |          |         |           |
| 35,36 | 9,6 | 50 <sup>■</sup> /28 <sup>■</sup> | 680,4 | 2+ | KHDNAQLFTGTK | ADW54354 | BA00015 | PIII-SVMP |
|       |     |                                  | 616,3 | 2+ | HDNAQLFTGTK  |          |         |           |
|       |     |                                  | 403,2 | 2+ | FNGGIIGK     |          |         |           |
|       |     |                                  | 742,9 | 2+ | EADYEEFLEIAR | G8XQX1   | BA00017 | LAO       |

Protein assignment undertaken by MALDI-TOF-TOF- and nESI- CID-MS/MS of peptide ions obtained from in-gel digested protein bands separated by SDS-PAGE. X = Ile or Leu; Z, pyroglutamic acid; M<sub>ox</sub>, methionine sulphoxide. Cysteine residues are carbamidomethylated. Nt, N-terminal sequence determined by automated Edman degradation. Apparent molecular masses (in kDa) were estimated from SDS-PAGE analysis of reduced samples.

**Table S3.** Assignment of reverse-phase fractions from the venom of *Echis carinatus sochureki* (Ecs) (UAE) to known protein families.

| Spot ID     | Mass % | Mass      | m/z    | z  | MS/MS or N-terminal (Nt)-derived sequences | Mascot score                                 | Protein ID NCBI               | Protein ID ECS- | Protein family   |                      |
|-------------|--------|-----------|--------|----|--------------------------------------------|----------------------------------------------|-------------------------------|-----------------|------------------|----------------------|
| <b>ECS-</b> |        |           |        |    |                                            |                                              |                               |                 |                  |                      |
| 2,3         | 0.1    | 5246      | 795.3  | 3+ | Nt                                         | VDHDHD(H) <sub>6</sub> PGSSV(G) <sub>7</sub> | 159232571                     | 00086           | pHpG             |                      |
|             | 1.0    |           |        |    |                                            | ECESGPCCRNCKFLKEGTI                          | 159162948                     |                 | SVMP disintegrin |                      |
| 4           | 3.6    |           | 444.1  | 1+ |                                            | ZKW                                          | 159232571                     |                 | SVMPi            |                      |
| 5           | 0.9    | 5416      |        |    | Nt                                         | ECESGPCCRNCKFLKEGTI                          | 159162948                     | 00086           | SVMP disintegrin |                      |
| 6           | 0.8    | 14762     |        |    | Nt                                         | NSVHPCCDPVKCEPREGE                           | 6014970                       | 00036           | Disintegrin EC3A |                      |
|             |        |           |        |    | Nt                                         | NSVHPCCDPVKCEPREGE                           | 6014971                       |                 | Disintegrin EC3B |                      |
| 7           | 0.9    | 14807     |        |    | Nt                                         | NSVHPCCDPVTCEPREGE                           | 17375443                      | 00035           | Disintegrin EC6A |                      |
|             |        |           |        |    | Nt                                         | NSVHPCCDPVTCKPKRGK                           | 17375444                      |                 | Disintegrin EC6B |                      |
| 8-11        | 1.1    | 23-26 kDa |        |    |                                            |                                              | 142                           | 297593852       | 00056/<br>00213  | SVMP (frag)          |
| 12,13       | 1.3    | 23 kDa    |        |    |                                            |                                              | 208                           | 297593828       | 00012            | SVMP (frag)          |
| 14,15       | 0.5    | 26 kDa    | 1425.7 | 1+ |                                            | XFCEXXKNTCK                                  | de novo<br>de novo<br>de novo | 297593852       | 00056/<br>00213  | SVMP (frag)          |
|             |        |           | 1222.5 | 1+ |                                            | AESYFYCRK                                    |                               |                 |                  |                      |
|             |        |           | 1094.5 | 1+ |                                            | AESYFYCR                                     |                               |                 |                  |                      |
| 16          | 4.9    | 14014     |        |    |                                            |                                              | 207                           | 2499430         | 00014            | S49-PLA <sub>2</sub> |
|             |        | 13834     | 866.4  | 1+ |                                            | NLNTYNK                                      | 276                           | 2499430         | 00014            | S49-PLA <sub>2</sub> |
|             |        |           | 471.2  | 2+ |                                            | GPPLDATDR                                    |                               |                 |                  |                      |

|       |     |        |           |    |                                |         |           |       |                      |
|-------|-----|--------|-----------|----|--------------------------------|---------|-----------|-------|----------------------|
|       |     |        | 1441.6 1+ |    | YTYYPNFWCK                     |         |           |       |                      |
|       |     |        | 1014.9 2+ |    | SPFPSYTSYGCFGGGER              |         |           |       |                      |
|       |     |        | 2243.9 1+ |    | CCLAHSCCYDTLPDCSPK             |         |           |       |                      |
|       |     |        | 820.8 2+  |    | ENGEIICENSTSK                  |         |           |       |                      |
| 17    | 1.9 | 13834  |           | Nt | SVVELGKMIQETGK                 | 117     | 2499430   | 00014 | S49-PLA <sub>2</sub> |
|       |     | 13654  |           | Nt | NLYQFGRMIWNRTGKPA              | 202     | ~27734436 | 00002 | D49-PLA <sub>2</sub> |
| 18    | 3.8 | 13851  |           | Nt | SIVELGKMIQETGK                 | 221     | 2499430   | 00014 | S49-PLA <sub>2</sub> |
|       |     | 13 kDa |           |    |                                | 282     | 2499430   | 00014 | S49-PLA <sub>2</sub> |
| 19    | 0.8 | 14848  |           |    |                                | 202     | 297594088 | 00036 | Disintegrin          |
| 20    | 0.9 | 14808  |           |    |                                | 117     | 17375443  | 00035 | Disintegrin EC6A     |
| 21,22 | 3.1 | 24642  |           | Nt | NVDFDSESPRKPEIQN               | 189     | 215262114 | 00168 | CRISP                |
|       |     |        | 582.7 2+  |    | NVDFDSESPR                     |         |           |       |                      |
|       |     |        | 640.6 3+  |    | KPEIQNEIIDLHNSLR               |         |           |       |                      |
|       |     |        | 764.9 2+  |    | WAFQCILDHSPR                   |         |           |       |                      |
|       |     |        | 835.8 2+  |    | SNCAASCFCHEIK                  |         |           |       |                      |
| 23    | 1.0 | 38 kDa |           |    | VIGGAECNINEHRFLAFVY            | 98      | 116113    | 00244 | Serine proteinase    |
|       |     |        | 552.6 2+  |    | IYFGLHNLK                      |         |           |       |                      |
|       |     |        | 963.6 3+  |    | LDKPVTSSSTHIAPISLPSSPPSVGVCVCR |         |           |       |                      |
|       | 0.8 | 34 kDa | 734.6 2+  |    | VIGGAECNINEHR                  | 91      | 297593764 | 00186 | Serine proteinase    |
|       |     |        | 552.6 2+  |    | IYFGLHNLK                      |         |           |       |                      |
| 24,25 | 0.6 | 35 kDa |           |    |                                | 92      | 116113    | 00244 | Serine proteinase    |
| 26    | 2.2 | 16 kDa |           | Nt | DFDCPPEWSTYDQYCYKA             | 32      |           | 00006 | C-type lectin-like   |
|       |     |        | 1196.6 1+ |    | WTDGSNLIYK                     | de novo |           |       |                      |



|       |     |        |        |    |    |                     |         |           |       |  |                    |
|-------|-----|--------|--------|----|----|---------------------|---------|-----------|-------|--|--------------------|
|       |     |        | 1243.5 | 1+ |    | FTKNCFGLEK          | de novo |           |       |  |                    |
|       |     |        | 1260.5 | 1+ |    | CGDDYPFVCK          | de novo |           |       |  |                    |
|       |     | 12 kDa |        |    | Nt | AAFCCPIGWSSYDQNCYKA | 39      |           | 00230 |  | C-type lectin-like |
|       |     |        | 1030.5 | 1+ |    | MANHWSR             | de novo |           |       |  |                    |
|       |     |        | 1391.6 | 1+ |    | TDCSGTHNIVCK        | de novo |           |       |  |                    |
|       |     |        | 1500.8 | 1+ |    | AWNVEANCFVYK        | de novo |           |       |  |                    |
|       |     |        | 2008.1 | 1+ |    | DSHLVSLHNIAEADFVIK  | de novo |           |       |  |                    |
| 27    | 0.8 | 15 kDa |        |    |    |                     | 91      | 40889261  |       |  | C-type lectin-like |
|       |     | 13 kDa | 1353.6 | 1+ |    | GYCYFVFNQR          | 92      | ~82131555 | 00154 |  | C-type lectin-like |
|       |     |        | 1477.7 | 1+ |    | AWDNDLHCFTAK        | de novo |           |       |  |                    |
|       |     |        | 1908.8 | 1+ |    | DCHWEWSDGAQLDYK     | de novo |           |       |  |                    |
| 28    | 1.4 | 56 kDa |        |    |    |                     | 282     | 297593794 | 00053 |  | PIII-SVMP          |
|       | 3.2 | 48 kDa |        |    |    |                     | 282     | 297593794 | 00053 |  | PIII-SVMP          |
|       | 0.8 | 15 kDa |        |    | Nt | DQDCLSGWSFYEGHCYK   | 135     | 40889261  | 00102 |  | C-type lectin-like |
|       | 0.8 | 13 kDa |        |    | Nt | DCPQDWFVYKGYCYFVF   | 225     | ~82131555 | 00154 |  | C-type lectin-like |
| 29,30 | 7.1 | 52 kDa |        |    |    |                     | 159     | 297593826 | 00257 |  | PIII-SVMP          |
| 31    | 4.4 | 48 kDa |        |    |    |                     | 134     | 297593798 | 00053 |  | PIII-SVMP          |
|       |     | 18 kDa |        |    |    |                     | 104     | 38493055  | 00006 |  | C-type lectin-like |
| 32    | 8.6 | 53 kDa |        |    |    |                     | 180     | 297593818 | 00053 |  | PIII-SVMP          |
| 33    | 3.8 | 52 kDa |        |    |    |                     | 98      | 297303482 | 00473 |  | PIII-SVMP          |
| 35    | 8.9 | 55 kDa |        |    |    |                     | 213     | 297593804 | 00177 |  | PIII-SVMP          |
|       | 0.2 | 52 kDa |        |    |    |                     | 114     | 297593804 | 00177 |  | PIII-SVMP          |
|       | 0.2 | 17 kDa |        |    |    |                     | 112     | ~73621141 | 00038 |  | C-type lectin-like |

Postgenomic Processes Dictate Venom Variation

Supporting Information

|       |     |           |                                                             |                                                                |                                                     |           |       |  |                                                                                                            |
|-------|-----|-----------|-------------------------------------------------------------|----------------------------------------------------------------|-----------------------------------------------------|-----------|-------|--|------------------------------------------------------------------------------------------------------------|
| 35-43 | 0.2 | 13,15 kDa | 915.5 1+<br>511.3 2+<br>1040.5 1+<br>1353.7 1+<br>1477.7 1+ | BFSFFVVK<br>TADNBWMR<br>TNWYEAEK<br>GYCYFVFNBR<br>AWDNDLHCFTAK | de novo<br>de novo<br>de novo<br>de novo<br>de novo |           |       |  | C-type lectin-like<br>C-type lectin-like<br>C-type lectin-like<br>C-type lectin-like<br>C-type lectin-like |
| 36    | 2.8 | 56 kDa    |                                                             |                                                                | 167                                                 | 297593820 | 00043 |  | PIII-SVMP                                                                                                  |
| 37    | 0.3 | 58 kDa    |                                                             |                                                                | 102                                                 | 297593828 | 00062 |  | PIII-SVMP                                                                                                  |
|       | 0.5 | 42 kDa    |                                                             |                                                                | 289                                                 | 297593828 | 00062 |  | PIII-SVMP                                                                                                  |
| 38    | 5.2 | 42 kDa    |                                                             |                                                                | 293                                                 | 297593828 | 00062 |  | PIII-SVMP                                                                                                  |
| 39    | 2.4 | 48 kDa    |                                                             |                                                                | 322                                                 | 320579395 | 00087 |  | PIII-SVMP                                                                                                  |
|       | 2.3 | 23 kDa    |                                                             |                                                                | 91                                                  | 297594080 | 00117 |  | PI(PII)-SVMP                                                                                               |
|       |     | 13 kDa    |                                                             |                                                                | 86                                                  |           | 00154 |  | C-type lectin-like                                                                                         |
| 40    | 4.1 | 48 kDa    |                                                             |                                                                | 318                                                 | 297594078 | 00012 |  | PII-SVMP (188-390)                                                                                         |
|       | 0.1 | 23446     |                                                             |                                                                | 102                                                 | 297594078 | 00012 |  | PI(PII)-SVMP                                                                                               |
| 41    | 0.1 | 48 kDa    |                                                             |                                                                | 179                                                 | 297594072 | 00253 |  | PIII-SVMP                                                                                                  |
|       | 0.6 | 26 kDa    |                                                             |                                                                | 79                                                  | 297594078 | 00012 |  | PI(PII)-SVMP                                                                                               |
| 42    | 0.6 | 52 kDa    |                                                             |                                                                | 56                                                  |           | 00163 |  | PIII-SVMP                                                                                                  |
|       | 0.3 | 48 kDa    |                                                             |                                                                | 45                                                  | 297593828 | 00062 |  | PIII-SVMP                                                                                                  |
|       | 0.2 | 26 kDa    | 638.6 2+                                                    | NINFDNNVIGR                                                    | 79                                                  | 297594078 | 00012 |  | PI-SVMP                                                                                                    |
|       | 2.1 | 23 kDa    | 638.6 2+                                                    | NINFDNNVIGR                                                    | 102                                                 | 297594078 | 00012 |  | PI-SVMP                                                                                                    |
| 43    | 2.1 | 42 kDa    |                                                             |                                                                | 80                                                  | 297594072 | 00253 |  | PIII-SVMP                                                                                                  |
| 44    | 1.9 | 23196     | 753.1 2+                                                    | DLINVVSSSSDTLR                                                 | 111                                                 | 297594070 | 00253 |  | PI(PII)-SVMP                                                                                               |

|    |     |       |       |    |                |     |           |       |              |
|----|-----|-------|-------|----|----------------|-----|-----------|-------|--------------|
| 45 | 2.1 | 23196 | 753.1 | 2+ | DLINVVSSSSDTLR | 106 | 297594070 | 00253 | PI(PII)-SVMP |
|    | 1.9 | 23184 |       |    |                | 80  | 297594072 | 00253 | PI(PII)-SVMP |

---

Protein assignment undertaken by MALDI-TOF-TOF- and nESI- CID-MS/MS of peptide ions obtained from in-gel digested protein bands separated by SDS-PAGE. X = Ile or Leu; Z, pyroglutamic acid; M<sub>ox</sub>, methionine sulphoxide. Cysteine residues are carbamidomethylated. Nt, N-terminal sequence determined by automated Edman degradation. Apparent molecular masses (in kDa) were estimated from SDS-PAGE analysis of reduced samples.

**Table S4.** Assignment of reverse-phase fractions from the venom of *Echis ocellatus* (Eoc) (Nigeria) to known protein families.

| Spot ID    | Spot % | Mass    | MS/MS or N-terminal (Nt-)-derived sequences |    | Protein ID              |           | Protein family |                  |
|------------|--------|---------|---------------------------------------------|----|-------------------------|-----------|----------------|------------------|
|            |        |         | m/z                                         | z  | NCBI                    | EOC-      |                |                  |
| <b>EOC</b> |        |         |                                             |    |                         |           |                |                  |
| 2,3        | 0.4    |         | 573.4                                       | 2+ | AKKKDEAPK               | CAJ01681  |                | SVMP fragment    |
|            |        |         | 538.1                                       | 2+ | KKKDEAPKM               | CAJ01681  |                |                  |
|            |        |         | 750.3                                       | 3+ | DEGTKCGEGKVCNNGYCVDL    | CAJ01685  | 00024          |                  |
| 4          | 5.7    |         | 444.2                                       | 1+ | ZKW                     |           | 00007          | SVMPi            |
|            |        |         | 859.7                                       | 3+ | DCESGPCCDNCKFLKEGTICK   | Q3BER1    | 00006          | SVMP disintegrin |
|            |        |         | 927.4                                       | 3+ | DCESGPCCDNCKFLKEGTICKMA | Q3BER1    | 00006          | SVMP disintegrin |
| 6          | 2.3    | 5591.7  |                                             | Nt | DCESGPCCDNCKFLKEGTICK   | Q3BER1    | 00006          | SVMP disintegrin |
|            |        | 5494.3  |                                             | Nt | DCESGPCCDNCKFLKEGTICK   | Q3BER1    | 00006          | SVMP disintegrin |
|            |        | 5112.8  |                                             | Nt | DCESGPCCDNCKFLKEGTICK   | Q3BER1    | 00006          | SVMP disintegrin |
|            |        | 4765.1  |                                             | Nt | DCESGPCCDNCKFLKEGTICK   | Q3BER1    | 00006          | SVMP disintegrin |
| 10         | 1.5    | 14489.4 |                                             | Nt | NSAHPCCDPVTCQPKQGEHCI   | Q3BER6    |                | Disintegrin EO4B |
|            |        | 14584.6 |                                             |    |                         | Q3BER3    |                | Disintegrin EO4B |
|            |        | 14684.6 |                                             |    |                         | Q3BER6/R3 |                | Disintegrin EO4B |
| 11         | 0.6    | 14520.5 |                                             | Nt | NSAHPCCDPVTCQPKQGEHCI   | Q3BER4    |                | Disintegrin EO5  |
| 12         | 0.1    | 14502.3 | 721.3                                       | 2+ | QGEHCISGPCCR            |           |                | Disintegrin      |
|            |        |         | 520.8                                       | 2+ | FLNSGTICK               |           |                |                  |
|            |        |         | 886.4                                       | 2+ | NSAHPCCDPVTCQPK         |           |                |                  |
| 13         | 0.5    | 24 kDa  | 533.7                                       | 2+ | FKPAGTECR               |           | 00063          | SVMP DC-frag     |
|            |        |         | 540.7                                       | 2+ | GKSYFYCR                |           |                |                  |

|    |      |         |                                           |                            |                                                                                                |          |                            |
|----|------|---------|-------------------------------------------|----------------------------|------------------------------------------------------------------------------------------------|----------|----------------------------|
| 14 | <0.1 | 23 kDa  | 533.7<br>826.4<br>805.6                   | 2+<br>2+<br>3+             | FKPAGTECR<br>AVVGQDVCFEENKR<br>NECDLPEYCTGQSAECPIDR                                            | 00086/95 | SVMP DC-frag               |
| 15 | <0.1 | 24220   | 533.7<br>540.7<br>762.9<br>810.3<br>941.7 | 2+<br>2+<br>3+<br>3+<br>3+ | FKPAGTECR<br>GKSYFYCR<br>LHSWIECEFGGCCDQCR<br>NTCKYDYSEDPDYGMVGQGTK<br>SECDLPEYCTGQSVDCPIDHFHR | 00063    | SVMP DC-frag               |
| 16 | <0.1 | 21515   | 548.7<br>714.3<br>641.6<br>661.9<br>918.8 | 2+<br>2+<br>3+<br>3+<br>3+ | AESYFYCR<br>LFCEIIENTCK<br>NGQPCLNNYGYCYNGK<br>YDYSEDPNYGMVDEGK<br>SECDLPEYCTGQSADCPTDHFHK     | 00186    | SVMP DC-frag               |
| 17 | <0.1 | 23638   | 559.8<br>606.3<br>850.9<br>819.9<br>738.3 | 2+<br>2+<br>2+<br>2+<br>3+ | LGNTYAYCR<br>CPLTLYQCR<br>DVVGQVQESCFQYNR<br>SFGDYISCLPCYR<br>LHSWVECESGCCDQCR                 | 00022/24 | SVMP DC-frag               |
| 18 | 0.3  | 23 kDa  | 591.8<br>648.8<br>718.8<br>857.4          | 2+<br>2+<br>2+<br>3+       | NQCISLFGSR<br>NPCQIFYTPR<br>LYCFDNLPEHK<br>AIVAEDACFQFNSLGIDYGYCR                              | 00081    | SVMP DC-frag               |
| 19 | 8.8  | 13825.6 | 2000.8<br>1368.8                          | 1+<br>1+                   | Nt SVVELGKMIQETGKSPFPS<br>SPFPSYTSYGCFCGGGEK<br>YTYYPNFLCK                                     | P48650   | 00015 S49-PLA <sub>2</sub> |

|    |     |         |        |    |    |                     |          |          |                      |
|----|-----|---------|--------|----|----|---------------------|----------|----------|----------------------|
|    |     |         | 1535.6 | 1+ |    | CCFVHSCCYDK         |          |          |                      |
| 20 | 1.7 | 13861.6 |        |    | Nt | SVIEFGTMIIETGRSPFPF | AAN77204 | 00079    | D49-PLA <sub>2</sub> |
| 21 | 0.4 | 29627.6 | 505.8  | 2+ |    | FLTQYNPK            | CAJ01685 | 00022/24 | SVMP DC-frag         |
|    |     |         | 516.3  | 2+ |    | CMINKPLR            |          |          |                      |
| 22 | 0.5 |         | 906.9  | 2+ |    | TDIISPPVCGNELLER    | CAJ01685 | 00022/24 | SVMP DC-frag         |
|    |     |         | 501.3  | 2+ |    | AGTLCRPAR           |          |          |                      |
|    |     |         | 606.3  | 2+ |    | CPLTLYQCR           |          |          |                      |
|    |     |         | 850.9  | 2+ |    | DVVGQVQESCFQYNR     |          |          |                      |
|    |     |         | 819.9  | 2+ |    | SFGDYISCLPCYR       |          |          |                      |
|    |     |         | 559.7  | 2+ |    | LGNTYAYCR           |          |          |                      |
| 23 | 0.7 | 23818.4 | 582.8  | 2+ |    | GETYLIEPLK          | CAJ01681 | 00006    | PI(PII)-SVMP         |
|    |     |         | 844.3  | 2+ |    | SYQFSDCSMNEYR       |          |          |                      |
| 24 | 1.2 | 28 kDa  | 797.2  | 2+ |    | TXCAGXXEGGXDSCK     | AAR24534 |          | Serine proteinase    |
|    |     |         | 598.6  | 2+ |    | XMGWGSXTTTK         |          | 00181    | Serine proteinase    |
| 25 | 0.1 | 24753.4 | 769.8  | 2+ |    | MEWYPEAAANAER       |          | 00029    | CRISP                |
|    |     |         | 582.7  | 2+ |    | NVDFDSEGPR          |          |          |                      |
|    |     |         | 640.6  | 3+ |    | KPEIQNEIIDLHNSLR    |          |          |                      |
| 26 | 2.6 | 29610.8 |        |    |    |                     |          |          |                      |
|    |     | 16 kDa  | 611.5  | 3+ |    | DCXPGWSSHEGHCHYK    |          | 00125    | C-type lectin-like   |
|    |     |         | 808.3  | 2+ |    | QSGXDFVWTGXTYK      |          | 00124    | C-type lectin-like   |
|    |     |         | 634.6  | 2+ |    | WVNXYCEER           |          | 00521    | C-type lectin-like   |
|    |     | 14 kDa  | 598.3  | 2+ |    | CDWGWNTNGAK         |          | 00372    | C-type lectin-like   |
|    |     |         | 700.8  | 2+ |    | DCSSGWTAYGK         |          |          |                      |
|    |     |         | 636.0  | 3+ |    | LTAQTLESQIIVWMGLSK  |          |          |                      |
| 27 | 0.4 | 31 kDa  | 452.1  | 2+ |    | TLCAGILR            |          | 00049    | Serine proteinase    |

|    |      |         |       |    |                   |          |          |                    |
|----|------|---------|-------|----|-------------------|----------|----------|--------------------|
|    |      |         | 755.6 | 2+ | LETPWAAKNVQPR     |          |          |                    |
|    |      |         | 629.2 | 2+ | SSELVIGGAECDINEHR | 00315    |          | Serine proteinase  |
|    |      |         | 649.6 | 4+ | VPHCANLEILDYSVCR  |          |          |                    |
|    | <0.1 | 16 kDa  | 808.3 | 2+ | QSGXDFVWTGXTYK    | 00124    |          | C-type lectin-like |
|    |      |         | 634.6 | 2+ | WVNXYCEER         | 00521    |          | C-type lectin-like |
|    | <0.1 | 14 kDa  | 598.3 | 2+ | CDWGWTNGAK        | 00372    |          | C-type lectin-like |
|    |      |         | 700.8 | 2+ | DCSSGWTAYGK       |          |          |                    |
| 28 | 0.9  | 29451.3 | 505.8 | 2+ | FLTQYNPK          | CAJ01685 | 00022/24 | SVMP DC-frag       |
|    |      |         | 516.3 | 2+ | CMINKPLR          |          |          |                    |
|    |      |         | 906.9 | 2+ | TDIISPPVCGNELLER  |          |          |                    |
|    |      |         | 501.3 | 2+ | AGTLCRPAR         |          |          |                    |
|    |      |         | 606.3 | 2+ | CPLTLYQCR         |          |          |                    |
|    |      |         | 850.9 | 2+ | DVVGQVQESCFQYNR   |          |          |                    |
|    |      |         | 819.9 | 2+ | SFGDYISCLPCYR     |          |          |                    |
|    |      |         | 559.7 | 2+ | LGNTYAYCR         |          |          |                    |
| 29 | 0.2  | 33 kDa  | 614.8 | 2+ | VFDYDDWXR         | CAD86932 |          | Serine proteinase  |
|    |      |         | 715.8 | 2+ | SXPSSPPSVGSTCR    |          | 00181    |                    |
|    |      |         | 735.8 | 2+ | VXGGAECNXNEHR     |          | 00315    |                    |
|    | 0.1  | 16 kDa  | 511.2 | 2+ | YNVWIGLR          |          | 00038    | C-type lectin-like |
|    |      |         | 632.2 | 2+ | AEFLTQLVSQK       |          |          |                    |
|    |      |         | 683.4 | 3+ | FCNQWDGGHLSIESTAK |          |          |                    |
|    | 0.1  | 14 kDa  | 517.7 | 2+ | TTDNQWLR          |          | 00124    | C-type lectin-like |
|    |      |         | 741.8 | 2+ | AWNNELNCFVSK      |          |          |                    |
| 30 | 0.6  | 18 kDa  | 597.8 | 2+ | CDWAWSNGAK        |          | 00056    | C-type lectin-like |
|    |      |         | 629.3 | 3+ | FCSEQANGGHLVSVHSR |          |          |                    |

|       |     |        |       |    |                          |       |                    |
|-------|-----|--------|-------|----|--------------------------|-------|--------------------|
|       | 0.7 | 17 kDa | 743.8 | 2+ | WVNFYCEKPSR              | 00133 | C-type lectin-like |
|       |     |        | 424.8 | 2+ | TWVDAEK                  |       |                    |
|       |     |        | 382.7 | 2+ | VFNQEK                   |       |                    |
|       |     |        | 360.2 | 2+ | CIGLEK                   |       |                    |
| 31-32 | 0.8 | 18 kDa | 629.3 | 3+ | FCSEQANGGHLVSVHSR        | 00334 | C-type lectin-like |
|       |     |        | 870.4 | 3+ | EAGLVGVLAYQTLESEIWMGLSK  |       |                    |
|       |     |        | 737.9 | 3+ | YEAWAEESYCIYIASNNK       |       |                    |
|       |     |        | 686.9 | 3+ | EWNSRPECMEFGHFACK        |       |                    |
|       |     |        | 796.3 | 2+ | EQQCNP EWNDGSK           | 00380 | C-type lectin-like |
|       |     |        | 468.3 | 2+ | IYVNWK                   |       |                    |
|       |     |        | 630.9 | 3+ | FCSEQANGGHLVSIQSR        |       |                    |
|       |     |        | 410.6 | 2+ | TWADA EK                 |       |                    |
|       |     | 17 kDa | 424.8 | 2+ | TWVDAEK                  | 00133 | C-type lectin-like |
|       |     |        | 743.8 | 2+ | WVNFYCEKPSR              |       |                    |
|       |     | 16 kDa | 352.7 | 2+ | WVPFR                    | 00087 | C-type lectin-like |
|       |     |        | 632.4 | 2+ | AEFLTQLVSQK              |       |                    |
|       |     |        | 511.3 | 2+ | YNVWIGLR                 |       |                    |
|       |     |        | 575.4 | 2+ | KYNVWIGLR                |       |                    |
|       |     |        | 683.6 | 3+ | FCNQWDGGHLVSIESTAK       |       |                    |
|       |     | 14 kDa | 517.7 | 2+ | TTDNQWLR                 | 00124 | C-type lectin-like |
|       |     |        | 741.8 | 2+ | AWNNE LNCFVSK            |       |                    |
|       |     |        | 829.8 | 2+ | VDFVWIGMSDFWR            |       |                    |
| 33    | 2.1 | 52 kDa | 665.4 | 2+ | VTVLEASQLVGGR            | 00167 | LAO                |
|       |     |        | 647.8 | 2+ | EGWYANLGPMR              |       |                    |
|       |     |        | 690.8 | 2+ | KFWEDDGIQGGK             |       |                    |
|       |     |        | 748.7 | 3+ | DIVVVGAGMSGLSAAYVLAGAGHK |       |                    |
|       |     |        | 729.4 | 2+ | EADYEEFLEIAK             |       |                    |
|       |     |        | 606.4 | 2+ | NPLEECFR                 |       |                    |



|       |        |               |              |                    |                         |           |                    |          |
|-------|--------|---------------|--------------|--------------------|-------------------------|-----------|--------------------|----------|
| 34    | 3.2    | 98 kDa        | 556.3        | 2+                 | TLDSFGEWR               | CAJ01685  | 00022/24           | PIV-SVMP |
|       |        |               | 691.4        | 2+                 | YVEFIIIVDQR             |           |                    |          |
|       |        |               | 605.3        | 3+                 | TDIISPPVCGNELLER        |           |                    |          |
|       |        |               | 738.3        | 3+                 | LHSWVECESGECCDQCR       |           |                    |          |
|       |        |               | 819.8        | 2+                 | SFGDYISCLPCYR           |           |                    |          |
|       | 16 kDa | 851.4         | 2+           | DVVGVEQESCFQYNR    | 00087                   |           | C-type lectin-like |          |
|       |        | 511.3         | 2+           | YNVWIGLR           |                         |           |                    |          |
|       |        | 575.4         | 2+           | KYNVWIGLR          |                         |           |                    |          |
|       |        | 683.6         | 3+           | FCNQWDGGHLVSIESTAK |                         |           |                    |          |
|       |        | 14 kDa        | 517.7        | 2+                 |                         |           |                    | TTDNQWLR |
| 741.8 | 2+     |               | AWNNELNCFVSK |                    |                         |           |                    |          |
| 0.7   | 56 kDa | 556.3         | 2+           | TLDSFGEWR          | 00022/24                | PIII-SVMP |                    |          |
|       |        | 691.4         | 2+           | YVEFIIIVDQR        |                         |           |                    |          |
|       |        | 605.3         | 3+           | TDIISPPVCGNELLER   |                         |           |                    |          |
|       |        | 738.3         | 3+           | LHSWVECESGECCDQCR  |                         |           |                    |          |
|       |        | 819.8         | 2+           | SFGDYISCLPCYR      |                         |           |                    |          |
|       |        | 851.4         | 2+           | DVVGVEQESCFQYNR    |                         |           |                    |          |
| 35    | 2.2    | 56 kDa        | 483.2        | 2+                 | SYVDNFR                 | 00089     | PIII-SVMP          |          |
|       |        |               | 710.8        | 2+                 | SVGVEDYSPIVR            |           |                    |          |
|       |        |               | 730.8        | 2+                 | AEDTLYSFGDWR            |           |                    |          |
|       |        |               | 766.8        | 3+                 | IYEMLNTVNEIYLYLHIR      |           |                    |          |
|       |        |               | 899.9        | 3+                 | HYYQNFLT DYKPDCTLIRPPR  |           |                    |          |
|       |        |               | 547.8        | 2+                 | FRPAGTECR               |           |                    |          |
|       |        |               | 738.2        | 3+                 | LHSWVECESGECCDQCR       |           |                    |          |
|       |        |               | 915.6        | 3+                 | SECDLPEYCTGQSADCPTDVFHR |           |                    |          |
|       |        |               | 540.3        | 2+                 | YNNDLTAIR               |           |                    |          |
|       |        |               | 0.5          | 52 kDa             | 591.8                   |           |                    | 2+       |
| 564.8 | 2+     | LYCLDNSSR     |              |                    |                         |           |                    |          |
| 810.3 | 2+     | LGICYNGDCPIMR |              |                    |                         |           |                    |          |

|    |      |        |       |    |                         |        |       |           |
|----|------|--------|-------|----|-------------------------|--------|-------|-----------|
|    |      |        | 694.4 | 2+ | VPLVGIVFWSNR            |        |       |           |
|    | 2.1  | 48 kDa | 715.8 | 2+ | APLVGIEFWNQR            | Q2UXQ9 | 00063 | PIII-SVMP |
|    |      |        | 762.9 | 3+ | LHSWIECEFGGCCDQCR       |        |       |           |
|    |      |        | 836.9 | 3+ | TWIIYeMVNTVNeIYLPLNIR   |        |       |           |
|    |      |        | 533.8 | 2+ | FKPAGTECR               |        |       |           |
|    |      |        | 941.4 | 3+ | SECDLPEYCTGQSVDCPIDHFHR |        |       |           |
| 36 | 10.2 | 62 kDa | 533.8 | 2+ | FKPAGTECR               |        | 00089 | PIII-SVMP |
|    |      |        | 541.9 | 2+ | GESYFYCR                |        |       |           |
|    |      |        | 826.4 | 2+ | AVVGQDVCFEENKR          |        |       |           |
|    |      |        | 746.3 | 3+ | LHPWVECETGCCDQCR        |        |       |           |
|    |      |        | 805.6 | 3+ | NECDLPEYCTGQSAECPIDR    |        |       |           |
| 37 | 4.2  | 56 kDa | 799.6 | 2+ | FSVGVVEDYS(514.1)       |        |       | PIII-SVMP |
|    |      |        | 512.4 | 2+ | GTGYFYCR                |        |       |           |
|    | 5.3  | 52 kDa | 767.1 | 3+ | LHSWIECEFGECCEQCR       |        | 00013 | PIII-SVMP |
|    |      |        | 665.4 | 2+ | HIELVIVVDHR             |        |       |           |
|    |      |        | 710.9 | 2+ | LFCEIVPNICR             |        |       |           |
|    |      |        | 533.8 | 2+ | FKPAGTECR               |        |       |           |
|    |      |        | 501.9 | 2+ | GEGDFYCR                |        |       |           |
| 38 | 5.6  | 62 kDa | 591.8 | 2+ | NQCISLFGSR              |        | 00081 | PIII-SVMP |
|    |      |        | 605.8 | 2+ | CPLTLYQCR               |        |       |           |
|    |      |        | 648.9 | 2+ | NPCQIFYTPR              |        |       |           |
|    |      |        | 718.8 | 2+ | LYCFDNLPEHK             |        |       |           |
| 39 | 2.2  | 56 kDa | 857.4 | 3+ | AIVAEDACFQFNSLGIDYGYCR  |        |       |           |
|    |      |        | 640.9 | 2+ | VAIVADYLIFR             |        | 00001 | PIII-SVMP |
|    |      |        | 672.4 | 2+ | MPQCILIKPSR             |        |       |           |
|    |      |        | 819.9 | 2+ | IYEILNILNEIYK           |        |       |           |

|       |     |            |       |    |                       |        |           |         |
|-------|-----|------------|-------|----|-----------------------|--------|-----------|---------|
|       |     |            | 829.5 | 2+ | HIKVAIVADYLIFR        |        |           |         |
| 39a   | 3.0 | 48 kDa     | 745.9 | 3+ | ITHDNAQLLTAVNLNGDTIGR | 00028  | PIII-SVMP |         |
|       | 2.7 | 52 kDa     | 710.9 | 2+ | LFCEXVPNXCR           | 00013  | PIII-SVMP |         |
| 41-43 | 8.5 | 110/56 kDa | 743.8 | 2+ | GYCYNGNCPXXR          | 00008  | PIII-SVMP |         |
|       |     |            | 836.9 | 3+ | TWIIYeMVNTVNeIYLPLNIR | 00404  | PIII-SVMP |         |
| 42,43 | 7.8 | 23 kDa     | 745.9 | 3+ | ITHDNAQLLTAVNLNGDTIGR | Q2UXQ3 | 00028     | PI-SVMP |
|       |     |            | 626.6 | 2+ | EILNSFGEWR            |        |           |         |
|       |     |            | 722.8 | 2+ | AQDSYHFSDCSK          |        |           |         |
|       |     |            | 455.2 | 2+ | ZQHFDPR               |        |           |         |
| 42b   | 1.4 | 56 kDa     | 852.4 | 2+ | YVQLVIVADHSMVTK       | 00071  | PIII-SVMP |         |
| 43    | 6.5 | 56 kDa     | 852.4 | 2+ | YVQLVIVADHSMVTK       | 00071  | PIII-SVMP |         |
|       |     |            | 844.4 | 2+ | SYQFSDCSMNEYR         |        |           |         |
|       |     |            | 598.9 | 2+ | (154.1)GECCDNCK       |        |           |         |
|       |     |            | 743.8 | 2+ | GYCYNGNCPXXR          |        |           |         |

Protein assignment undertaken by MALDI-TOF-TOF- and nESI- CID-MS/MS of peptide ions obtained from in-gel digested protein bands separated by SDS-PAGE. X = Ile or Leu; Z, pyroglutamic acid; M<sub>ox</sub>, methionine sulfoxide. Cysteine residues are carbamidomethylated. Nt, N-terminal sequence determined by automated Edman degradation. Apparent molecular masses (in kDa) were estimated from SDS-PAGE analysis of reduced samples.

**Table S5.** Assignment of reverse-phase fractions from the venom of *Echis coloratus* (Eco) (Egypt) to known protein families.

| Spot ID     | Mass % | Mass      | m/z    | z  | MS/MS or N-terminal (Nt)-derived sequences | Mascot score         | Protein ID NCBI | Protein ID ECO- | Protein family   |                      |
|-------------|--------|-----------|--------|----|--------------------------------------------|----------------------|-----------------|-----------------|------------------|----------------------|
| <b>ECO-</b> |        |           |        |    |                                            |                      |                 |                 |                  |                      |
| 3,4         | 0.5    | 5631      |        |    | Nt                                         | GEECDCGSPADCQNP      |                 | 00144           | SVMP disintegrin |                      |
|             | 0.8    | 5561      |        |    | Nt                                         | CDCGSPADCQNPCCD      |                 | 00144           | SVMP disintegrin |                      |
| 5           | 2.9    |           | 444.1  | 1+ |                                            | ZKW                  | 159232571       |                 | SVMPi            |                      |
| 6           | 1.8    | 5395.6    |        |    | Nt                                         | GEECDCGSPADCQNP      |                 | 00144           | SVMP disintegrin |                      |
| 7           | 0.3    |           | 559.0  | 2+ |                                            | (226.3)VSDAPVVPP     | de novo         |                 | unknown          |                      |
| 8-12        | 2.1    | 22-26 kDa |        |    |                                            |                      | 142             | 297593852       | 00406            | SVMP                 |
| 13          | 3.7    | 14485     |        |    |                                            |                      | 171             | 182705261       | 00024            | Disintegrin          |
| 14,15       | 1.8    | 13994     |        |    | Nt                                         | NLYQFGKMIKNTGKPAMFSY | 153             | 25453159        | 00186            | D49-PLA <sub>2</sub> |
|             |        |           | 1854.5 | 1+ |                                            | FENEDIICGDDDDPCR     |                 |                 |                  |                      |
| 16          | 0.9    | 14328     |        |    | Nt                                         | NSAHPCCDPVTCQPRE     | 131             | 297594068       | 00024            | Disintegrin          |
| 17          | 4.2    | 13692     |        |    | Nt                                         | SVIELGKMIVQLTNKTPAS  | 288             | 2499430         | 00035            | S49-PLA <sub>2</sub> |
|             |        |           | 946.5  | 1+ |                                            | MIVQLTNK             |                 |                 |                  |                      |
|             |        |           | 524.8  | 2+ |                                            | IYPNILCR             |                 |                 |                  |                      |
|             |        |           | 670.4  | 2+ |                                            | YKIYPNILCR           |                 |                 |                  |                      |
|             |        |           | 401.7  | 2+ |                                            | AVAICLR              |                 |                 |                  |                      |
|             |        |           | 1286.7 | 1+ |                                            | AVAICLRENLK          |                 |                 |                  |                      |
|             |        |           | 1607.7 | 1+ |                                            | ICECDKAVAICLR        |                 |                 |                  |                      |

|       |     |                |           |    |                      |     |            |        |                      |
|-------|-----|----------------|-----------|----|----------------------|-----|------------|--------|----------------------|
|       |     |                | 1826.7 1+ |    | WENGEIICENSTSCK      |     |            |        |                      |
|       |     |                | 927.4 2+  |    | TPASYVSYGCFCGGGDR    |     |            |        |                      |
|       |     |                | 1059.5 2+ |    | YKWENGEIICENSTSCK    |     |            |        |                      |
|       |     |                | 2305.8 1+ |    | CCFVHSCCYDTLPDCSPK   |     |            |        |                      |
| 18    | 3.3 | 13901<br>13720 | 945.5 1+  |    | TDQYKYK              | 220 | ~2499430   | ~00035 | S49-PLA <sub>2</sub> |
|       |     |                | 946.5 1+  |    | MIVQLTNK             |     |            |        |                      |
|       |     |                | 980.4 1+  |    | RICECDK              |     |            |        |                      |
|       |     |                | 524.8 2+  |    | IYPNILCR             |     |            |        |                      |
|       |     |                | 1339.7 1+ |    | YKIYPNILCR           |     |            |        |                      |
|       |     |                | 941.4 2+  |    | TPVSYVSYGCFCGGGDR    |     |            |        |                      |
|       |     |                | 2117.8 1+ |    | YKWENGEIICENSTSCK    |     |            |        |                      |
|       |     |                | 2305.8 1+ |    | CCFVHSCCYDTLPDCSPK   |     |            |        |                      |
| 19    | 3.8 | 13798          |           | Nt | HLLQFENMIYQKTGKFA    | 254 | 25453160   | 00086  | D49-PLA <sub>2</sub> |
|       |     |                | 1563.8 1+ |    | HLLQFENMIYQK         |     |            |        |                      |
|       |     |                | 2086.9 1+ |    | FAIIAYSNYGICYCGWGGK  |     |            |        |                      |
|       |     |                | 1533.5 1+ |    | CCFVHDCCYGR          |     |            |        |                      |
|       |     |                | 1236.6 1+ |    | VAANCF AENLK         |     |            |        |                      |
|       |     |                | 1284.6 1+ |    | YWLSSIIDCK           |     |            |        |                      |
| 20,21 | 4.2 | 24683          |           | Nt | NVDFDSESPRKPEIQNEIID | 348 | ~215262114 | 00025  | CRISP                |
|       |     |                | 1537.7 1+ |    | MEWYPEAAAANAER       |     |            |        |                      |
|       |     |                | 1571.7 1+ |    | CGENIYMSPYPIK        |     |            |        |                      |
|       |     |                | 1462.6 1+ |    | GGCAAAYCPSSAYK       |     |            |        |                      |
|       |     |                | 1495.7 1+ |    | EDEFINCNDLVK         |     |            |        |                      |
|       |     |                | 1670.7 1+ |    | SNCAASCFCHSEIK       |     |            |        |                      |
| 22    | 0.4 | 33 kDa         |           |    |                      | 198 | 297593754  | 00285  | Serine proteinase    |
| 23    | 0.4 | 41 kDa         |           |    |                      | 113 | 297593768  | 00112  | Serine proteinase    |
|       | 0.3 | 39 kDa         | 1104.5 1+ |    | TLCAGVLEGGK          | 91  | 297593768  | 00112  | Serine proteinase    |

|       |     |        |           |  |                    |     |            |        |                    |
|-------|-----|--------|-----------|--|--------------------|-----|------------|--------|--------------------|
|       |     |        | 1194.6 1+ |  | IMGWGTISTTK        |     |            |        |                    |
|       |     |        | 1284.6 1+ |  | TMKIHFGVHSK        |     |            |        |                    |
| 24    | 0.9 | 38 kDa |           |  |                    | 125 | 297593768  | 00112  | Serine proteinase  |
| 25    | 0.5 | 42 kDa |           |  |                    | 216 | 297593738  | 00182  | Serine proteinase  |
| 26    | 0.7 | 36 kDa |           |  |                    | 144 | 297593782  | 00206  | Serine proteinase  |
| 27    | 0.1 | 37 kDa |           |  |                    | 132 | 297593766  | 00042  | Serine proteinase  |
|       | 1.2 | 16 kDa |           |  |                    | 178 | ~82174837  | 00131  | C-type lectin-like |
|       | 1.2 | 13 kDa |           |  |                    | 144 | ~33243080  | 00115  | C-type lectin-like |
| 28    | 0.8 | 37 kDa |           |  |                    | 289 | 297593766  | 00042  | Serine proteinase  |
|       | 1.6 | 16 kDa | 1832.8 1+ |  | GGHLASIESSEEGDFVAK | 78  | ~82174837  | 00041  | C-type lectin-like |
|       | 1.6 | 13 kDa | 1538.8 1+ |  | SSADYVWIGLWNK      | 142 |            | 00038  | C-type lectin-like |
| 29    | 0.1 | 42 kDa |           |  |                    | 81  | ~297593750 |        | Serine proteinase  |
|       | 0.1 | 16 kDa |           |  |                    | 76  | ~82174837  | 00041  | C-type lectin-like |
|       | 0.1 | 13 kDa |           |  |                    | 106 | ~82090788  | 00038  | C-type lectin-like |
| 30,31 | 0.1 | 48 kDa |           |  |                    | 69  | ~297593766 | ~00042 | Serine proteinase  |
|       | 0.1 | 16 kDa | 1832.8 1+ |  | GGHLASIESSEEGDFVAK | 76  | ~82174837  | 00041  | C-type lectin-like |
|       | 0.1 | 13 kDa | 1538.8 1+ |  | SSADYVWIGLWNK      |     |            |        |                    |
|       |     |        | 1260.6 1+ |  | CGDDYPFVCK         | 106 | ~82090788  | 00038  | C-type lectin-like |
| 32    | 0.3 | 17 kDa |           |  |                    | 131 |            | 00127  | C-type lectin-like |
|       | 1.6 | 16 kDa |           |  |                    | 264 | ~82090788  | 00038  | C-type lectin-like |
|       | 1.6 | 13 kDa |           |  |                    | 279 | ~82090788  | 00038  | C-type lectin-like |

|       |     |           |                         |                   |     |            |       |                    |
|-------|-----|-----------|-------------------------|-------------------|-----|------------|-------|--------------------|
| 33    | 0.4 | 16 kDa    |                         |                   | 105 |            | 00153 | C-type lectin-like |
|       | 0.4 | 13 kDa    |                         |                   | 264 | ~82090788  | 00038 | C-type lectin-like |
| 35,36 | 4.6 | 56 kDa    |                         |                   | 151 | ~347602327 | 00544 | LAO                |
| 37    | 1.8 | 58 kDa    |                         |                   | 192 | 297593872  | 00034 | PIII-SVMP          |
| 38    | 1.3 | 65 kDa    |                         |                   | 193 | 297593876  | 00010 | PIII-SVMP          |
|       | 6.0 | 58 kDa    |                         |                   | 125 | 297593890  | 00023 | PIII-SVMP          |
|       | 0.1 | 19 kDa    | 935.5 1+                | IYVNWK            | 42  |            | 00052 | C-type lectin-like |
|       |     |           | 1569.7 1+               | EQQCTSEWNDGSK     |     |            |       |                    |
|       |     |           | 1903.9 1+               | FCTEQANGGHLVSIQSR |     |            |       |                    |
|       | 0.1 | 16 kDa    |                         |                   | 109 |            | 00197 | C-type lectin-like |
| 39    | 4.6 | 65 kDa    |                         |                   | 133 | 297593904  | 00050 | PIII-SVMP          |
|       | 3.5 | 58 kDa    |                         |                   | 193 | 297593902  | 00012 | PIII-SVMP          |
| 40    | 3.1 | 65 kDa    |                         |                   | 219 | 297593904  | 00050 | PIII-SVMP          |
|       | 0.8 | 58 kDa    |                         |                   | 236 | 297593874  | 00012 | PIII-SVMP          |
| 41    | 0.4 | 58 kDa    |                         |                   | 112 | 297593848  | 00002 | PIII-SVMP          |
| 42    | 0.6 | 58 kDa    |                         |                   | 183 | 297593880  | 00002 | PIII-SVMP          |
| 43    | 2.6 | 58 kDa    |                         |                   | 174 | 297593942  | 00061 | PIII-SVMP          |
|       | 1.5 | 42 kDa    |                         |                   | 90  | 297593880  | 00002 | PIII-SVMP          |
|       | 1.3 | 40 kDa    |                         |                   | 218 | 297593880  | 00009 | PIII-SVMP          |
|       | 0.4 | 28 kDa    | 1433.8 1+               | SVGVIEDYSPIVR     | 68  |            | 00009 | PIII-SVMP (fragm)  |
|       |     |           | 2270.9 1+               | LHSWVECEFGQCCDQCR |     |            |       |                    |
|       |     | 2682.2 1+ | SECDLPESCTGQSAECPTDVFHR |                   |     |            |       |                    |
|       | 0.1 | 17 kDa    | 1279.8 1+               | HITHFWIGLR        | 38  |            | 00197 | C-type lectin-like |
|       |     |           | 1317.6 1+               | EHMTWEEAER        |     |            |       |                    |

|    |     |        |        |    |                      |         |           |       |                    |
|----|-----|--------|--------|----|----------------------|---------|-----------|-------|--------------------|
|    | 0.1 | 14 kDa | 1966.9 | 1+ | SEWSDGSSVSYDNLHKR    | 78      |           | 00069 | C-type lectin-like |
| 44 | 0.8 | 58 kDa |        |    |                      | 122     | 297593866 | 00002 | PIII-SVMP          |
|    | 1.6 | 28 kDa | 1701.9 | 1+ | YIELVIVADHAMVTK      | 78      | 297594018 | 00011 | PI(PII)-SVMP       |
|    |     |        | 1892.8 | 1+ | TWVHQIVNDMTVMYR      |         |           |       |                    |
|    |     |        | 2239.1 | 1+ | DLITVTSSAEDTLNLFGTWR |         |           |       |                    |
| 45 | 4.6 | 58 kDa |        |    |                      | 89      | 297593954 | 00009 | PIII-SVMP          |
|    | 1.4 | 28 kDa |        |    |                      | 78      | 297594018 | 00011 | PI(PII)-SVMP       |
|    | 1.8 | 26 kDa | 1653.8 | 1+ | NDADSTASISTCNGLK     | 61      |           | 00020 | PI-SVMP            |
|    |     |        | 1701.9 | 1+ | YIELVIVADHAMVTK      |         |           |       |                    |
| 46 | 6.4 | 58 kDa |        |    |                      | 111     | 297593956 | 00001 | PIII-SVMP          |
|    | 0.3 | 24 kDa |        |    |                      | 129     | 297594002 | 00047 | PI-SVMP            |
| 47 | 1.1 | 58 kDa |        |    |                      | 110     | 297593880 | 00002 | PIII-SVMP          |
| 48 | 1.6 | 58 kDa |        |    |                      | 140     | 297593954 | 00009 | PIII-SVMP          |
|    | 3.8 | 24 kDa | 915.5  | 1+ | ERDLLNR              | de novo |           | 00017 | PI-SVMP            |
|    |     |        | 1066.6 | 1+ | SFGEWRER             | de novo |           |       |                    |
| 49 | 2.1 | 58 kDa |        |    |                      | 150     | 297593866 | 00002 | PIII-SVMP          |

Protein assignment undertaken by MALDI-TOF-TOF- and nESI- CID-MS/MS of peptide ions obtained from in-gel digested protein bands separated by SDS-PAGE. X = Ile or Leu; Z, pyroglutamic acid; M<sub>ox</sub>, methionine sulphoxide. Cysteine residues are carbamidomethylated. Nt, N-terminal sequence determined by automated Edman degradation. Apparent molecular masses (in kDa) were estimated from SDS-PAGE analysis of reduced samples.



**Table S6.** Assignment of the reverse-phase fractions from the venom of *Echis pyramidum leakeyi* (Epl) (Kenya) to known protein families

| Spot ID    | Mass %     | Mass            | m/z    | z  | MS/MS or N-terminal (Nt)-derived sequences | Mascot score | Protein ID NCBI | EPL-  | Protein family       |
|------------|------------|-----------------|--------|----|--------------------------------------------|--------------|-----------------|-------|----------------------|
| <b>EPL</b> |            |                 |        |    |                                            |              |                 |       |                      |
| 4          | 1.6        | 5556            |        |    | Nt DCASGPCCRDCKFLKEGTI                     |              | 82207847        | 00006 | SVMP disintegrin     |
| 5          | 3.9        |                 | 444.1  | 1+ | ZKW                                        |              | 159232571       |       | SVMPi                |
| 6          | 2.7        | 5435<br>5296    |        |    | Nt CASGPCCRDCKFLKEGTI                      |              | 82207847        | 00006 | SVMP disintegrin     |
| 7          | 1.4        |                 | 559.0  | 2+ | (226.3)VSDAPVVPP                           | de novo      |                 |       | unknown              |
| 8          | 0.4        | 12 kDa          |        |    |                                            | 103          | ~82194569       |       | SVMP disintegrin     |
| 9          | 0.5        | 23 kDa          |        |    | NLYQFGKMIKNKTGKPAM                         | 107          | ~27734436       | 00001 | D49-PLA <sub>2</sub> |
| 10,11      | 12.3       | 14103           |        |    | NLYQFGKMIKNKTGK                            | 358          | 27734438        | 00071 | D49-PLA <sub>2</sub> |
| 12         | 0.4<br>7.2 | 22 kDa<br>13697 |        |    | SVIELGKMIIQLTNKTPAS                        | 186          |                 | 00012 | S49-PLA <sub>2</sub> |
|            |            |                 |        |    | SVIELGKMIIQLTNKTPAS                        | 334          |                 | 00195 | S49-PLA <sub>2</sub> |
|            |            |                 | 1825.9 | 1+ | TPASYVSYGCFGGGDK                           |              |                 |       |                      |
|            |            |                 | 1082.7 | 1+ | IYPNFLCR                                   |              |                 |       |                      |
|            |            |                 | 2305.7 | 1+ | CCFVHSCCYDTLPDCSPK                         |              |                 |       |                      |
| 13         | 0.8        | 36 kDa          |        |    |                                            | 132          | ~297593760      |       | Serine proteinase    |
| 14         | 0.2        | 28 kDa          |        |    |                                            | 101          | ~71041900       |       | CRISP                |
| 15         | 0.5        | 38 kDa          |        |    |                                            | 270          | ~297593784      |       | Serine proteinase    |

|       |     |           |           |                   |     |            |       |                    |
|-------|-----|-----------|-----------|-------------------|-----|------------|-------|--------------------|
| 16    | 0.4 | 35 kDa    |           |                   | 151 | ~297593732 | 00435 | Serine proteinase  |
| 17    | 1.2 | 42 kDa    |           |                   | 175 | 297593750  | 00502 | Serine proteinase  |
| 18,19 | 3.0 | 46 kDa    |           |                   | 118 |            | 00098 | Serine proteinase  |
|       | 0.6 | 16 kDa    |           |                   | 219 |            | 00053 | C-type lectin-like |
|       | 0.6 | 13 kDa    |           |                   | 81  |            | 00018 | C-type lectin-like |
| 23,24 | 0.3 | 56 kDa    |           |                   | 204 | ~347602327 | 00544 | LAO                |
|       | 1.2 | 16 kDa    | 1311.7 1+ | CVGLEEQTGYSR      | 68  |            | 00016 | C-type lectin-like |
|       |     |           | 1568.9 1+ | VFNQEMTWADA EK    |     |            |       |                    |
|       | 1.2 | 13 kDa    | 1949.1 1+ | SSIYYVWIGLSYEGPSK | 103 |            | 00066 | C-type lectin-like |
| 25    | 1.8 | 56 kDa    |           |                   | 204 | ~347602327 | 00544 | LAO                |
|       | 0.2 | 16 kDa    |           |                   | 97  |            | 00016 | C-type lectin-like |
|       | 0.1 | 15 kDa    |           |                   | 137 |            | 00010 | C-type lectin-like |
|       | 2.4 | 13 kDa    |           |                   | 115 |            | 00066 | C-type lectin-like |
| 26    | 1.5 | 20 kDa    |           |                   | 133 | ~82131629  | 00081 | C-type lectin-like |
| 27    | 1.3 | 48-50 kDa |           |                   | 176 | 297593964  | 00008 | PIII-SVMP          |
|       | 1.4 | 17 kDa    |           |                   | 145 |            | 00109 | C-type lectin-like |
|       | 1.3 | 12 kDa    |           |                   | 368 | ~82090802  | 00031 | C-type lectin-like |
| 28    | 8.9 | 46 kDa    |           |                   | 306 | 297593962  | 00008 | PIII-SVMP          |
| 29    | 2.0 | 52 kDa    |           |                   | 137 | ~27805465  | 00159 | PIII-SVMP          |
|       | 1.8 | 46 kDa    |           |                   | 80  | 297593962  | 00008 | PIII-SVMP          |
| 30    | 4.9 | 55 kDa    |           |                   | 297 | 297593966  | 00029 | PIII-SVMP          |

|       |     |        |        |    |                 |                |                         |       |                      |
|-------|-----|--------|--------|----|-----------------|----------------|-------------------------|-------|----------------------|
| 31    | 6.2 | 56 kDa | 1701.9 | 1+ | YIELVIVADHAMVTK | 261<br>de novo | 297593996<br>~297594018 | 00019 | PIII-SVMP<br>PI-SVMP |
|       | 1.3 | 28 kDa |        |    |                 |                |                         |       |                      |
| 32    | 3.5 | 63 kDa |        |    |                 | 164            | 297593958               | 00002 | PIII-SVMP            |
| 33    | 0.6 | 67 kDa |        |    |                 | 121            | 297593982               | 00040 | PIII-SVMP            |
|       | 2.1 | 48 kDa |        |    |                 | 133            | ~297593936              | 00008 | PIII-SVMP            |
|       | 0.5 | 24 kDa |        |    |                 | 91             | ~297594080              | 00005 | PI-SVMP              |
| 34    | 0.6 | 63 kDa |        |    |                 | 150            | 297593984               | 00396 | PIII-SVMP            |
|       | 4.1 | 23 kDa |        |    |                 | 91             | ~297594080              | 00005 | PI-SVMP              |
| 35    | 0.6 | 63 kDa |        |    |                 | 118            | 297593996               | 00019 | PIII-SVMP            |
|       | 5.6 | 24 kDa |        |    |                 | 88             | ~297594080              | 00005 | PI-SVMP              |
| 36,37 | 5.5 | 55 kDa |        |    |                 | 198            | 297593974               | 00044 | PIII-SVMP            |
| 35-37 | 0.1 | 16 kDa | 1469.6 | 1+ | TWEEAEKFCNR     | de novo        |                         | 00010 | C-type lectin-like   |
|       |     | 15 kDa | 1476.7 | 1+ | CFVLNQYTEFR     |                |                         |       |                      |
| 38    | 0.5 | 56 kDa |        |    |                 | 147            | 297593996               | 00019 | PIII-SVMP            |
|       | 4.2 | 42 kDa |        |    |                 | 92             | ~297593828              | 00032 | PIII-SVMP            |

Protein assignment undertaken by MALDI-TOF-TOF- and nESI- CID-MS/MS of peptide ions obtained from in-gel digested protein bands separated by SDS-PAGE. X = Ile or Leu; Z, pyroglutamic acid; M<sub>ox</sub>, methionine sulphoxide. Cysteine residues are carbamidomethylated. Nt, N-terminal sequence determined by automated Edman degradation. Apparent molecular masses (in kDa) were estimated from SDS-PAGE analysis of reduced samples.

**Table S7.** Functional characterisations of *Echis*, *B. arietans* and *C. cerastes* venom.

|                        | LD <sub>50</sub>                                 |                                                  |                                                |
|------------------------|--------------------------------------------------|--------------------------------------------------|------------------------------------------------|
|                        | Mouse:<br>µg/mouse<br>(95% confidence intervals) | Scorpion:<br>µg/µl<br>(95% confidence intervals) | Locust:<br>µg/µl<br>(95% confidence intervals) |
| <i>B. arietans</i>     | 4.26<br>(2.53-5.13)                              | 82.15<br>(49.62-120.31)                          | 597.30<br>(376.80-921.00)                      |
| <i>C. cerastes</i>     | 7.71<br>(4.38-13.37)                             | Not determined                                   | Not determined                                 |
| <i>E. c. sochureki</i> | 15.10<br>(6.49-19.70)                            | 9.55<br>(6.91-11.93)                             | 305.40<br>(193.20-468.00)                      |
| <i>E. ocellatus</i>    | 12.43<br>(9.00-20.45)                            | 39.07<br>(27.34-50.26)                           | 377.5<br>(236.30-593.40)                       |
| <i>E. p. leakeyi</i>   | 13.55<br>(8.98-38.33)                            | 9.55<br>(6.91-11.93)                             | 147.60<br>(92.70-218.00)                       |
| <i>E. coloratus</i>    | 9.81<br>(6.06-19.25)                             | 139.89<br>(97.19-211.59)                         | 394.40<br>(249.60-609.00)                      |

|                        | Haemorrhage             | Coagulation                   |                               | ED <sub>50</sub>                         |
|------------------------|-------------------------|-------------------------------|-------------------------------|------------------------------------------|
|                        | Lesion size in mm (SEM) | µg to clot 200µl human plasma | µg to clot 200µl mouse plasma | µl/mouse (95% confidence intervals)      |
| <i>B. arietans</i>     | 12.10<br>(+/- 0.422)    | No clotting at 100µg dose     | No clotting at 100µg dose     | No protection at 150µl dose <sup>1</sup> |
| <i>C. cerastes</i>     | 12.82<br>(+/- 0.465)    | No clotting at 100µg dose     | No clotting at 100µg dose     | No protection at 150µl dose <sup>2</sup> |
| <i>E. c. sochureki</i> | 10.28<br>(+/- 0.831)    | 0.35                          | 0.52                          | No protection at 150µl dose <sup>3</sup> |
| <i>E. ocellatus</i>    | 10.82<br>(+/- 0.455)    | 0.09                          | 0.25                          | 58.46<br>(35.32-90.92)                   |
| <i>E. p. leakeyi</i>   | 9.33<br>(+/- 0.271)     | 0.44                          | 0.25                          | 64.87<br>(23.86-129.65)                  |
| <i>E. coloratus</i>    | 11.99<br>(+/- 0.732)    | 17.5                          | 2.51                          | 44.25<br>(21.90-58.29)                   |

SEM – standard error of the mean. EchITAbG is a monospecific anti-*E. ocellatus* antivenom. <sup>1</sup> 4/5 mice survived at this dose. <sup>2</sup> 0/5 mice survived at this dose. <sup>3</sup> 1/5 mice survived at this dose.

**Table S8.** Estimated models of sequence evolution determined by MrModelTest.

| Toxin family     | Model at each codon position |                    |                    |
|------------------|------------------------------|--------------------|--------------------|
|                  | 1                            | 2                  | 3                  |
| SVMP             | GTR + I + $\Gamma$           | GTR + I + $\Gamma$ | GTR + $\Gamma$     |
| SP               | GTR + $\Gamma$               | GTR + I + $\Gamma$ | GTR + $\Gamma$     |
| PLA <sub>2</sub> | GTR + $\Gamma$               | GTR + $\Gamma$     | GTR + $\Gamma$     |
| CTL              | GTR + I + $\Gamma$           | GTR + I + $\Gamma$ | GTR + I + $\Gamma$ |
| CRISP            | GTR + $\Gamma$               | HKY + $\Gamma$     | GTR + $\Gamma$     |
| LAAO             | GTR + $\Gamma$               | GTR + $\Gamma$     | HKY + $\Gamma$     |

The models of sequence evolution implemented in MrBayes for each dataset were selected using the Akaike information criterion (AIC) in MrModelTest (<http://www.abc.se/~nylander/mrmodeltest2/mrmodeltest2.html>).

#### 4. SI REFERENCES

1. Casewell NR, Harrison RA, Wüster W, Wagstaff SC (2009) Comparative venom gland transcriptome surveys of the saw-scaled vipers (Viperidae: Echis) reveal substantial intra-family gene diversity and novel venom transcripts. *BMC Genomics* 10:564.
2. Wagstaff SC, Harrison RA (2006) Venom gland EST analysis of the saw-scaled viper, *Echis ocellatus*, reveals novel  $\alpha 9\beta 1$  integrin-binding motifs in venom metalloproteinases and a new group of putative toxins, renin-like aspartic proteases. *Gene* 377:21–32.
3. Paine MJ, Desmond HP, Theakston RDG, Crampton JM (1992) Gene expression in *Echis carinatus* (Carpet Viper) venom glands following milking. *Toxicon* 30:379–386.
4. Calvete JJ (2011) Proteomic tools against the neglected pathology of snake bite envenoming. *Expert Rev Proteomics* 8:739–758.
5. Casewell NR et al. (2011) Domain loss facilitates accelerated evolution and neofunctionalization of duplicate snake venom metalloproteinase toxin genes. *Mol Biol Evol* 28:2637–2649.
6. Sanz-Soler R et al. (2012) Recombinant expression of mutants of the Frankenstein disintegrin, RTS-ocellatusin. Evidence for the independent origin of RGD and KTS/RTS disintegrins. *Toxicon* 60:665–675.
7. Edgar RC (2004) MUSCLE: multiple sequence alignment with high accuracy and high throughput. *Nucleic Acids Res* 32:1792–1797.
8. Casewell NR, Wagstaff SC, Harrison RA, Wüster W (2011) Gene tree parsimony of multilocus snake venom protein families reveals species tree conflict as a result of multiple parallel gene loss. *Mol Biol Evol* 28:1157–1172.
9. Ronquist F et al. (2012) MrBayes 3.2: efficient Bayesian phylogenetic inference and model choice across a large model space. *Syst Biol* 61:539–542.
10. Drummond AJ, Rambaut A (2007) BEAST: Bayesian evolutionary analysis by sampling trees. *BMC Evol Biol* 7:214.
11. Vernet B, Stolzer M, Goldman A, Durand D (2008) Reconciliation with non-binary species trees. *J Comput Biol* 15:981–1006.

12. Casewell NR et al. (2010) Pre-clinical assays predict pan-African *Echis viper* efficacy for a species-specific antivenom. *PLoS Negl Trop Dis* 4:e851.
13. Finney DJ (1947) *Probit analysis; a statistical treatment of the sigmoid response curve*. (Macmillan, Oxford, England).
14. Barlow A, Pook CE, Harrison RA, Wüster W (2009) Coevolution of diet and prey-specific venom activity supports the role of selection in snake venom evolution. *Proc Biol Sci* 276:2443–2449.
15. Richards DP, Barlow A, Wüster W (2012) Venom lethality and diet: differential responses of natural prey and model organisms to the venom of the saw-scaled vipers (*Echis*). *Toxicon* 59:110–116.
16. Theakston RD, Reid HA (1983) Development of simple standard assay procedures for the characterization of snake venoms. *Bull World Heal Organ* 61:949–956.
